# Supplementary material for: Hepatotoxicity during 6-thioguanine treatment in inflammatory bowel disease and childhood acute lymphoblastic leukaemia: A systematic review
Source: PubMed Central journal article supplement (PMC6534292; doi:10.1371/journal.pone.0212157), 2019-05-24
Supplement: pone.0212157.s002.pdf [file pone.0212157.s002.pdf]

## S2 Appendix. Full search strategy

Search strategies:

| Electronic searches                                                     | Search strategy                                                                                                                                                                                                                                                                                                            | Number of hits |
|-------------------------------------------------------------------------|----------------------------------------------------------------------------------------------------------------------------------------------------------------------------------------------------------------------------------------------------------------------------------------------------------------------------|----------------|
| PubMed                                                                  | Thioguanine [mh] OR thioguanine [ot] OR thioguanine [ti] OR tioguanine [ot] OR tioguanine [ti] OR 6-thioguanine [ot] OR 6-thioguanine [ti] OR 6-tioguanine [ti] OR 6-tioguanine [ot] OR 6-TG [ot] OR 6-TG [ti] OR 6TG[ot] OR 6TG [ti] AND 1998:2018[dp]                                                                    | 792            |
| Embase                                                                  | *thioguanine/ OR (thioguanine or tioguanine or 6-thioguanine or 6thioguanine or 6-tioguanine or 6-TG or 6TG).ti,kw. and 1998:20018.(sa.year)                                                                                                                                                                               | 769            |
| Scopus                                                                  | TITLE(thioguanine) OR AUTHKEY(thioguanine) OR TITLE(tioguanine) OR AUTHKEY (tioguanine) OR TITLE(6-thioguanine) OR AUTHKEY(6-thioguanine) OR TITLE(6thioguanine) OR AUTHKEY(6thioguanine) OR TITLE(6-tioguanine) OR AUTHKEY(6-tioguanine) OR TITLE(6-TG) OR AUTHKEY(6-TG) OR TITLE(6TG) OR AUTHKEY(6TG) AND PUBYEAR > 1997 | 576            |
| Web of Science Core Collection                                          | TS=(t\$tioguanine) OR TS=(6-t\$tioguanine) OR TS=(6t\$tioguanine) OR TS=(6-TG) OR TS=(6TG)<br><i>Indexes=SCI-EXPANDED, SSCI, A&amp;HCI, CPCI-S, CPCI-SSH, BKCI-S, BKCI-SSH, ESCI Timespan=1998-2018</i><br>Limitations*                                                                                                    | 1087           |
| Conference proceedings                                                  |                                                                                                                                                                                                                                                                                                                            |                |
| American Society of Hematology (ASH)                                    | thioguanine, tioguanine, 6-thioguanine, 6thioguanine, 6-tioguanine, 6-TG, 6TG                                                                                                                                                                                                                                              | 15             |
| European Hematology Association (EHA)                                   | thioguanine, tioguanine, 6-thioguanine, 6thioguanine, 6-tioguanine, 6TG, 6-TG                                                                                                                                                                                                                                              | 28             |
| American College of Gastroenterology (ACG)                              | thioguanine, tioguanine, 6-thioguanine, 6thioguanine, 6-tioguanine, 6TG, 6-TG                                                                                                                                                                                                                                              | 2              |
| European Crohn's and Colitis Organization (ECCO)                        | thioguanine, tioguanine, 6-thioguanine, 6thioguanine, 6-tioguanine, 6TG, 6-TG                                                                                                                                                                                                                                              | 15             |
| American Association for the Study of Liver Diseases (AASLD)            | thioguanine, tioguanine, 6-thioguanine, 6thioguanine, 6-tioguanine, 6TG, 6-TG                                                                                                                                                                                                                                              | 0              |
| International Union of Basic & Clinical Pharmacology (IUPHAR)           | thioguanine, tioguanine, 6-thioguanine, 6thioguanine, 6-tioguanine, 6TG, 6-TG                                                                                                                                                                                                                                              | 5              |
| European Association for Clinical Pharmacology and Therapeutics (EACPT) | thioguanine, tioguanine, 6-thioguanine, 6thioguanine, 6-tioguanine, 6TG, 6-TG                                                                                                                                                                                                                                              | 0              |
| International Prospective Register of                                   | thioguanine OR tioguanine OR 6-thioguanine OR 6thioguanine OR 6-tioguanine OR 6-TG OR 6TG                                                                                                                                                                                                                                  | 4              |

|                                  |  |  |
|----------------------------------|--|--|
| Systematic Reviews<br>(PROSPERO) |  |  |
|----------------------------------|--|--|

\* **Refined by: WEB OF SCIENCE CATEGORIES:**( GASTROENTEROLOGY HEPATOLOGY OR PHARMACOLOGY PHARMACY OR ONCOLOGY OR HEMATOLOGY OR OBSTETRICS GYNECOLOGY OR NEUROSCIENCES OR CLINICAL NEUROLOGY OR GERIATRICS GERONTOLOGY OR PEDIATRICS OR OPHTHALMOLOGY OR RHEUMATOLOGY OR DERMATOLOGY OR SURGERY OR UROLOGY NEPHROLOGY OR TRANSPLANTATION OR INFECTIOUS DISEASES OR PATHOLOGY OR RADIOLOGY NUCLEAR MEDICINE MEDICAL IMAGING )
