# Supplementary material for: Hepatotoxicity during 6-thioguanine treatment in inflammatory bowel disease and childhood acute lymphoblastic leukaemia: A systematic review
Source: PubMed Central journal article supplement (PMC6534292; doi:10.1371/journal.pone.0212157), 2019-05-24
Supplement: pone.0212157.s003.pdf [file pone.0212157.s003.pdf]

### **S3 Appendix. Detailed description of included studies**

Study characteristics of the included RCTs are presented in Table A, study characteristics of observational studies in Table B, and study characteristics of case report/case series in Table C.

Results of the included RCTs are presented in Table D, results of observational studies in Table E, and results of case report/case series in Table F.

#### *Randomised controlled trials*

We included four RCTs. One RCT on relapsed childhood ALL used 6TG at a dose of 50 mg/m<sup>2</sup>/day together with weekly methotrexate as maintenance therapy for 24 months in 157 children, and for 12 months in 26 children. No hepatotoxicity was reported in either treatment arm at 15-year follow-up. [1] There was no comparator to 6TG.

Three other RCTs on childhood ALL compared maintenance therapy with 6TG to 6MP (target dose 50–75 mg/m<sup>2</sup>/day). In the CCG-1952 trial, the 6TG starting dose was reduced from 60 to 50 mg/m<sup>2</sup>/day by February 1998, [2] while the COALL-92 trial reduced the 6TG starting dose from 50 to 40 mg/m<sup>2</sup>/day – in both cases due to thrombocytopenia. [3] A starting dose of 40 mg/m<sup>2</sup>/day was used throughout the UK MRC ALL97/99 trial. [4] SOS was reported in the UK MRC ALL97/99 and CCG-1952 trials in 9% (N=68) and 25% (N=257) of patients in the 6TG-arm, respectively. [2,4] Both trials used clinical criteria to diagnose SOS fulfilling two of the following; hyperbilirubinaemia, hepatomegaly, discordant thrombocytopenia and/or ascites. The COALL-92 trial did not specifically report SOS; however, a 7.5 fold higher incidence of discordant thrombocytopenia was reported in the 6TG-arm. [3] Liver biopsies were obtained from 12 patients from the CCG-1952 trial, among whom 10 had hepato-portal sclerosis, one had venous dilatation, and one was normal. [5] Liver biopsies from 10 patients in the UK MRC ALL97/99 trial all showed

mild portal fibrosis or NRH. [4] In the CCG-1952 trial, Doppler ultrasound (US) was performed in 168 patients; showing ascites in 70 patients and reversal of portal flow in 11 patients. Three patients developed hepatic failure, of whom one had a liver transplant. [2] MRI/MRA or upper gastrointestinal (GI) endoscopy showed oesophageal and/or gastric varices in 11 cases, and three patients had actively bleeding esophageal varices.[5] In the UK MRC ALL97/99 trial, Doppler US was conducted in 10 patients with discordant thrombocytopenia; showing SOS in four patients, possible SOS in three patients, and was normal in three patients. [6] Upper GI endoscopy in 12 patients with suspected portal hypertension from this trial showed oesophageal varices in seven cases. One patient required liver transplantation because of hepatopulmonary syndrome. [4]

#### *Observational studies*

Four of the 20 included observational studies investigated the pharmacokinetics of 6TG. Together these studies encompassed a total of 47 patients and did not report any hepatotoxicity. All these studies noted a substantial inter-individual variation in the pharmacokinetics of 6TG. [7–10]

Most observational studies focused on IBD, except those reporting subcohorts from the RCTs investigating childhood ALL. Of the ALL trials, the CCG-1942 trial (58 patients; pilot study to the CCG-1952 trial) used 6TG orally (60mg/m<sup>2</sup>/day) as well as a continuous intravenous infusion (CIVI) (480 mg/m<sup>2</sup> over 24 hours every eight weeks), and reported SOS in 10% and alanine transaminase elevation during CIVI in 41%. At nine years follow-up, one patient (2%) showed evidence of portal hypertension. [11] A subcohort from the CCG-1952 trial reported SOS in 23% (N=351). [12] In the latest report from the MRC UKALL 97/99 trial (6TG dose 40mg/m<sup>2</sup>) hepatotoxicity was reported in 19% (N=59) of 6TG-treated patients in one centre, with NRH in four patients, oesophageal varices in four patients, and a follow-up of 107 patient-years. [13] In one trial,

using 6TG at 50 mg/m<sup>2</sup> together with methotrexate and vincristine for three months for relapsed childhood ALL, no hepatotoxicity was reported during a four year-follow-up period. [14]

A conservative estimate of the number of patients included in observational studies concerning adult IBD patients treated with 6TG is at least 794 patients in total. Hepatotoxicity in IBD patients treated with 6TG was first reported in 2002 in a cohort of 111 patients who received 6TG doses of 40 (10–100) mg/day and cumulative doses of 1.2–36 g. Elevated liver function tests occurred in 24% (N=27), while NRH was documented by liver biopsy in 14% (N=16). [15] Ery-TGN levels did not differ between patients with and without NRH or laboratory abnormalities. [16,17]

One study measured the hepatic venous pressure gradient (HVPG) in 26 patients treated with 6TG at 10 (6–40) mg/day at the time of HVPG measurement. These patients had received a maximum dose of 40 (20–80) mg/day over a period of 38 (12–45) months prior to the HVPG measurement. Liver biopsy in 24 of the patients showed NRH in 25% (N=6). HVPG was 7 (3–14) mmHg in patients with NRH, and 3 (2–5) mmHg in patients without NRH. [18]

A systematic survey identified 296 patients treated with 6TG for 370 patient-years between 2001 and 2004 in eight countries. 6TG was commenced at 40 mg/day, but were 20 (20–40) mg/day in patients without discontinuation after 93 weeks. Elevated liver enzymes were found in 15% (N=43); liver biopsy was performed in 60 of the patients, and showed acute hepatotoxicity in 13% (N=8), chronic hepatotoxicity in 38% (N=23), NRH in 10% (N=6), and possible NRH in 17% (N=10). Computed tomography (CT) scans were conducted in 16 patients, MRI in 53 patients, and ultrasound in 149 patients, and showed splenomegaly in 39% (N=68) and NRH in 1% (N=2). The individual investigators decided whether to perform any imaging and/or liver biopsy. 6TG was truncated in seven patients, among whom three patients with elevated liver enzymes failed to recover by the end of the follow-up period of 39 (13–113) weeks. [19]

Less hepatotoxicity was observed in a retrospective cohort of 62 patients treated between 2009 and 2013, when the daily dose of 6TG was split in two or more doses, with daily doses of 0.6 (0.3–1.0) mg/kg but no individual dose exceeding 0.3 mg/kg. A liver biopsy was obtained in 11 asymptomatic patients, who were treated at the same centre, and showed NRH in one case. MRI was performed in two patients and US in 21 patients; all these examinations were normal. [20]

In a retrospective cohort of 111 patients treated between 2002 and 2014 in seven Dutch centres, 6TG was administered at a dose of 21 (standard deviation 5) mg/day - reaching a cumulative dose of 13 (4–39) g. A liver biopsy was obtained in all patients, and showed NRH in 6% (N=7), lesser degrees of nodularity in 11% (N=12), and sinusoidal dilatation in 85% (N=76). No clinical adverse events occurred during the 20 (7–64) months of follow-up. A CT scan was conducted in two patients and ultrasound in 76 of the patients, and showed splenomegaly in 4% (N=3). [21]

In another retrospective cohort of 54 patients treated for 126 patient-years between 2001 and 2013 with 6TG doses of 27 (20–40) mg/day and reaching a cumulative dose of 13 (interquartile range 4–26) g, portal hypertension was reported in one case, and elevated liver enzymes in two other cases. All reported hepatotoxicities resolved when 6TG was truncated. A liver biopsy was obtained in eleven patients as a screening after 12 months or more of 6TG therapy, and no evidence of NRH was noted in any case; MRI was similarly performed as a screening in 24 patients and showed splenomegaly in one case. [22]

### *Case reports*

Thirteen of the 18 included case reports or case series encompassing 60 patients described hepatotoxicity defined as either abnormal liver enzymes, clinical SOS, or NRH. The reports that described hepatotoxicity used 6TG doses of 14–125 mg/m<sup>2</sup>/day with cumulative doses up to 20 g, whereas those that did not report hepatotoxicity used 6TG doses of 0.8–21 mg/m<sup>2</sup>/day and cumulative doses up to 19 g. Only five of the reports provided ery-TGN levels, which were 1156

pmol/ $8 \cdot 10^8$  RBC in one report that described hepatotoxicity, and 204–1143 pmol/ $8 \cdot 10^8$  RBC in the reports that did not note hepatotoxicity. In seven reports that described hepatotoxicity, a liver biopsy was performed in 16 patients, of which nine showed SOS, and four showed NRH. In one report that did not note hepatotoxicity, a liver biopsy was obtained in eight patients, in which no abnormalities were noted in five, subtle portal inflammation in one, slight sinusoidal dilatation in one, and steatosis in one case. Ultrasound was conducted in 16 patients across five reports that all noted hepatotoxicity, and found ascites in one, altered liver echogenicity in eight, and no abnormalities in four cases. Three reports that all reported hepatotoxicity used CT scans in three patients, of which two were normal and one showed hepatomegaly with mosaic pattern after dye injection. Two reports that both noted hepatotoxicity used magnetic resonance imaging (MRI) in 10 patients, which showed portal hypertension in one, gastric varices in one, increased contrast enhancement in one, and a diffuse patchy pattern in the portal phase (clover-like sign) in one. In six reports, 6TG treatment was truncated due to hepatotoxicity (SOS in three reports, NRH in one report, discordant thrombocytopenia in one report, and elevated liver enzymes in one report).

Two case reports describe 16 patients from the MRC UKALL 97/99 cohort in which clinically significant portal hypertension manifested by splenomegaly and thrombocytopenia persists in 13 cases. [23,24] Liver biopsy in six patients showed NRH in two cases. [23] Furthermore, endoscopy in 13 patients showed oesophageal varices in eight and gastric varices in one. [23,24] A case series from the CCG-1952 trial report hepatotoxicity in 12 cases, of which four developed chronic portal hypertension at 7–44 months after stopping 6TG. In all other cases the hepatotoxicity resolved completely. [25]

**Table A. Study characteristics of included randomised controlled trials**

| Trial                   | Report                 | Year | Publication type    | Setting                      | Duration          | Total number of patients | Number of patients in 6TG group | Number of patients in control group | Age, years median (range)                 | Gender, % male | Concomitant therapy                                      |
|-------------------------|------------------------|------|---------------------|------------------------------|-------------------|--------------------------|---------------------------------|-------------------------------------|-------------------------------------------|----------------|----------------------------------------------------------|
| ALL-REZ BFM 87          | Einsiedel et al.[1]    | 2005 | Original article    | Multi-centre, Germany        | 4/1997–4/1990     | 207                      | Group A+B, 157                  | Group C, 26                         | <18                                       | 57             | MTX                                                      |
| CCG-1952                | Matloub et al.[26]     | 2006 | Original article    | Multi-centre, USA            | 5/1996 – 2/2000   | 2027                     | Not reported                    | Not reported                        | 1–9                                       | 56             | IT MTX or ITT, MTX, prednisone, VCR                      |
|                         | Stork et al.[27]       | 1998 | Conference abstract |                              |                   | Not reported             | Not reported                    | Not reported                        | Not reported                              | Not reported   |                                                          |
|                         | Stork et al.[28]       | 2002 | Conference abstract |                              |                   | 2026                     | 1016                            | 1010                                | 1–10                                      | Not reported   |                                                          |
|                         | Stork et al.[5]        | 2002 | Conference abstract |                              |                   | 2177                     | 1012                            | 1017                                | 1–9.9                                     | 57             |                                                          |
|                         | Stork et al.[2]        | 2010 | Original article    |                              |                   | 2027                     | 1017                            | 1010                                | 1–1.9, n=165; 2–5.9, n=1402; 6–9.9, n=460 | 56             |                                                          |
| CO ALL-92               | Erb et al.[29]*        | 1998 | Original article    | Single-centre, Germany       | 2/1992 – 8/1997   | 54                       | 22                              | 32                                  | 1–18                                      | Not reported   | MTX                                                      |
|                         | Harms et al.[30]       | 2000 | Original article    | Multi-centre, Germany        |                   | 538                      | 236                             | 238                                 | <1, n=17; 1–9, n=415; >10, n=104          | 58             |                                                          |
|                         | Harms et al.[3]        | 2003 | Original article    |                              |                   | 474                      | 236                             | 238                                 | 4.8 (1–17.8)                              | 58             |                                                          |
| UK MRC ALL 97/ Pilot    | Lancaster et al.[31]   | 1998 | Original article    | Single-centre, UK            | 10/1995 – 6/1997  | 46                       | 23                              | 23                                  | 5 (1–16)                                  | 61             | ASP, CYC, CYT, dexamethasone, MTX, VCR                   |
|                         | Stoneham et al.[6]     | 2003 | Original article    |                              | 10/1995 – 11/2001 | 99                       | 62                              | 37                                  | 1–14                                      | 57             | Not reported                                             |
| UK MRC ALL97 & UKALL XI | Hann et al.[32]        | 2000 | Original article    | Multi-centre, UK             | 3/1992 – 7/1998   | 1781                     | Not reported                    | Not reported                        | 1–18                                      | 54             | MTX, steroid (randomised: prednisone/dexamethasone), VCR |
| UK MRC ALL 97 & 97/99   | Cartwright et al.[33]  | 2008 | Conference abstract | Single-centre, UK            | Not reported      | 80                       | 34                              | 46                                  | 1–18                                      | 55             | MTX, steroid (randomised: prednisone/dexamethasone), VCR |
|                         | Cartwright et al.[34]* | 2011 | Conference abstract |                              | 4/1997 – 4/2009   | 130                      | 31                              | 99                                  | 1–16                                      | 61             |                                                          |
|                         | Lancaster et al.[35]*  | 2002 | Original article    |                              | Not reported      | 10                       | 6                               | 4                                   | 6.2 (2.8–10.5)                            | 50             |                                                          |
|                         | Lennard et al.[36]     | 2001 | Conference abstract |                              | Not reported      | 12                       | 8                               | 4                                   | 7 (3–16)                                  | 70             |                                                          |
|                         | Lennard et al.[37]     | 2003 | Conference abstract | Multi-centre, UK and Ireland | 1/1997 – 6/2002   | 1496                     | 749                             | 747                                 | Not reported                              | Not reported   |                                                          |
|                         | Lennard et al.[38]     | 2005 | Conference abstract |                              | 1/1997 – 6/2003   | 1498                     | 750                             | 748                                 | Not reported                              | Not reported   |                                                          |

|                     |      |                     |                          |      |              |              |                                    |              |
|---------------------|------|---------------------|--------------------------|------|--------------|--------------|------------------------------------|--------------|
| Lennard et al.[39]  | 2006 | Original article    | 1/1997 – 6/2006          | 1492 | 748          | 744          | 4 (1–18)                           | Not reported |
| Lennard et al.[40]  | 2008 | Conference abstract | 1/1997 – 6/2004          | 1194 | 450          | 744          | 4 (1–18)                           | Not reported |
| Lennard et al.[41]  | 2008 | Conference abstract | 1/1997 – 6/2005          | 1194 | 450          | 744          | Not reported                       | Not reported |
| Lennard et al.[42]* | 2013 | Original article    | 1/1997 – 6/2007          | 1211 | 457          | 754          | 1–18                               | Not reported |
| Lennard et al.[43]* | 2015 | Original article    | Not reported – June 2002 | 1135 | 426          | 709          | <2, n=74; 2-9, n=865; >10, n=143   | 53           |
| Mitchell et al.[44] | 2002 | Conference abstract | 1/1997 – 6/2007          | 1432 | Not reported | Not reported | Not reported                       | Not reported |
| Mitchell et al.[45] | 2009 | Original article    | 1/1997 – 6/2007          | 1492 | 748          | 744          | <2, n=139; 2-9, n=1396; >10n=400   | 56           |
| Mitchell et al.[46] | 2010 | Original article    | 1980 – 2001              | 1440 | 723          | 717          | <1, n=1; 1–9, n=1534; >10, n=400   | 56           |
| Vora et al.[47]     | 2002 | Conference abstract | 1/1997 – 6/2002          | 1342 | 668          | 674          | 1–18                               | Not reported |
| Vora et al.[4]      | 2006 | Original article    | 4/1997 – 6/2002          | 1492 | 748          | 744          | <2, n=114; 2-9, n=1154; >10, n=224 | 54           |

6TG, 6-thioguanine; ASP, asparaginase; CYC, cyclophosphamide; CYT, cytarabine; IT, intrathecal; ITT, intrathecal triple therapy; MTX, methotrexate; VCR, vincristine.

\* Studies only concerning pharmacokinetics or TPMT activity

**Table B. Study characteristics of included observational studies**

| Study                 | Report               | Year                | Publication type     | Design               | Setting                  | Duration       | Total number of patients                                                                                     | Age (years), median (range)             | Gender, % male | Disease                  | Concomitant therapy, n                                        | Risk of bias    |
|-----------------------|----------------------|---------------------|----------------------|----------------------|--------------------------|----------------|--------------------------------------------------------------------------------------------------------------|-----------------------------------------|----------------|--------------------------|---------------------------------------------------------------|-----------------|
| CCG-1942              | Jacobs et al.[48]    | 2005                | Conference abstract  | Prospective cohort   | Not reported             | Not reported   | 58                                                                                                           | 4 (1–10)                                | 47             | ALL                      | Not reported                                                  | See S4 Appendix |
|                       | Jacobs et al.[11]    | 2007                | Original article     | Prospective cohort   | Multi-centre, USA        | 1/1995–4/1996  | 58                                                                                                           | 4 (1–10)                                | 47             | ALL                      | MTX; prednisone; VCR                                          |                 |
| CCG-1952              | Lowe et al.[49]*     | 2001                | Original article     | Prospective cohort   | Multi-centre, USA        | 1/1995–4/1996  | 41                                                                                                           | 3 (1–9)                                 | 51             | ALL                      | MTX; prednisone; VCR                                          |                 |
|                       | Wray et al.[12]      | 2014                | Original article     | Retrospective cohort | Multi-centre, USA        | 1996–2000      | 351                                                                                                          | 1–10                                    | 54             | ALL                      | Not reported                                                  |                 |
|                       | Cheung et al.[50]    | 2003                | Original article     | Prospective cohort   | Single-centre, Australia | Not reported   | 15                                                                                                           | 34 (17–65)                              | 40             | IBD (CD 13, UC 1, IC 1)  | 6MP, 5; AZA, 1; entocort, 1; prednisone, 6                    | Fair            |
| Deibert et al. 2003   | Deibert et al.[8]*   | 2003                | Original article     | Cross-over study     | Germany                  | Not reported   | 6                                                                                                            | 44 (27–54)                              | 33             | IBD (CD)                 | Steroids                                                      | Fair            |
|                       | Deibert et al.[51]*  | 2003                | Conference abstract  | Cross-over study     | Not reported             | Not reported   | 6                                                                                                            | 42 mean (SD 12)                         | 33             | IBD (CD)                 | Steroids                                                      |                 |
| Dubinsky et al. 2003  | Dubinsky et al.[52]  | 2000                | Conference abstract  | Prospective cohort   | Not reported             | Not reported   | 8                                                                                                            | Not reported                            | Not reported   | IBD (CD 6, UC 2)         | Not reported                                                  | Fair            |
|                       | Dubinsky et al.[53]  | 2001                | Conference abstract  | Prospective cohort   | Not reported             | Not reported   | 17                                                                                                           | 43 (9–63)                               | Not reported   | IBD                      | Not reported                                                  |                 |
|                       | Dubinsky et al.[54]  | 2001                | Original article     | Prospective cohort   | Single-centre, USA       | 7/1999–7/2002  | 10                                                                                                           | 40 (9–64)                               | Not reported   | IBD (CD)                 | Steroids, 6                                                   |                 |
|                       | Dubinsky et al.[17]  | 2003                | Original article     | Prospective cohort   | Single-centre, USA       | Not reported   | 21                                                                                                           | 38 (24–63)                              | 57             | IBD (CD 14, UC 7)        | Not reported                                                  |                 |
|                       | Dubinsky et al.[55]  | 2003                | Original article     | Prospective cohort   | Single-centre, USA       | 11/1999–2/2002 | 111, group 1, with laboratory abnormalities <sup>†</sup> (n=29); group 2, no laboratory abnormalities (n=82) | Group 1, 42 (17–70); group 2, 38 (9–81) | 52             | IBD (CD 77, UC 30, IC 3) | INF, 6; mesalamine 67; prednisone, 46                         |                 |
|                       | Dubinsky et al.[56]  | 2003                | Conference abstract  | Prospective cohort   | Not reported             | Not reported   | 111                                                                                                          | Not reported                            | Not reported   | IBD                      | Not reported                                                  |                 |
|                       | Geller et al.[57]    | 2003                | Conference abstract  | Retrospective cohort | Single-centre, USA       | Not reported   | 125                                                                                                          | Not reported                            | Not reported   | IBD                      | Not reported                                                  |                 |
|                       | Geller et al.[58]    | 2004                | Original article     | Retrospective cohort | Single-centre, USA       | Not reported   | 111                                                                                                          | 39 (9–67)                               | 68             | IBD                      | Not reported                                                  |                 |
| Poordad et al.[16]    | 2002                 | Conference abstract | Retrospective cohort | Single-centre, USA   | 1999–2002                | 125            | 40                                                                                                           | 65                                      | IBD            | Not reported             |                                                               |                 |
| Ferlitsch et al. 2007 | Ferlitsch et al.[59] | 2005                | Conference abstract  | Prospective cohort   | Not reported             | Not reported   | 24                                                                                                           | 39 (23–76)                              | 46             | IBD (CD 21, UC 2, IC 1)  | Not reported                                                  | Fair            |
|                       | Ferlitsch et al.[18] | 2007                | Original article     | Prospective cohort   | Single-centre, Austria   | 11/2004–7/2005 | 26                                                                                                           | 41 (23–76)                              | 42             | IBD (CD 23, UC 2, IC 1)  | 5-ASA, 5; INF, 3; investigational biologicals, 2; steroids, 5 |                 |



|                       |                        |                  |                     |                      |                              |                 |            |                 |              |                          |                                                                                  |      |
|-----------------------|------------------------|------------------|---------------------|----------------------|------------------------------|-----------------|------------|-----------------|--------------|--------------------------|----------------------------------------------------------------------------------|------|
|                       | Hasyagar et al.[60]    | 2007             | Conference abstract | Retrospective cohort | Single-centre, USA           | 2002–2007       | 24         | 48 mean (17–86) | 29           | IBD (CD 23, UC 1)        | Not reported                                                                     | n/a  |
|                       | Ivastinovic et al.[61] | 2004             | Conference abstract | Prospective cohort   | Not reported                 | Not reported    | 12         | 20–46           | Not reported | IBD (CD)                 | INF, 4; prednisone, 2                                                            | n/a  |
| Jharap et al. 2011    | Jharap et al.[62]*     | 2008             | Conference abstract | Cross-over study     | Single-centre                | Not reported    | 12         | 44 mean (26–61) | 17           | IBD (CD 6)               | Not reported                                                                     | Fair |
|                       | Jharap et al.[10]*     | 2011             | Original article    | Cross-over study     | Single-centre, Netherlands   | 7/2005 – 6/2007 | 12         | 41 (26–61)      | 17           | IBD (CD 6, UC 6)         | Mesalazine 5                                                                     |      |
|                       | Kornbluth et al.[63]   | 2002             | Conference abstract | Prospective cohort   | USA                          | Not reported    | 15         | Not reported    | Not reported | IBD (CD 10, UC 5)        | Steroids                                                                         | n/a  |
|                       | Lancaster et al.[7]*   | 2001             | Original article    | Cross-over study     | Single-centre, UK            | Not reported    | 11         | 4 (2–7)         | Not reported | ALL                      | Cytarabine, daunorubicin, etoposide, steroids, VCR                               | n/a  |
|                       | Omer et al.[64]        | 2015             | Conference abstract | Retrospective cohort | Single-centre, UK            | 2012–2015       | 28         | 44 mean (19–67) | 50           | IBD (CD 13, UC 14, IC 1) | Not reported                                                                     | n/a  |
| Pavlidis et al. 2014  | Pavlidis et al.[65]    | 2014             | Conference abstract | Retrospective cohort | Multi-centre, UK, Australia  | Not reported    | 62         | Not reported    | Not reported | IBD (CD 21, UC/IC 41)    | Biologic therapy, calcineurin inhibitor therapy, steroids                        | Fair |
|                       | Pavlidis et al.[20]s   | 2014             | Original article    | Retrospective cohort | Multi-centre, UK, Australia  | 2009–7/2013     | 62         | 42 (20–75)      | 40           | IBD (CD 21, UC 41)       | 5-ASA, 32; anti-TNF, 9; calcineurin inhibitor, 15; cyclosporine or tacrolimus, 5 |      |
|                       | Qasim et al.[66]       | 2007             | Original article    | Prospective cohort   | Single-centre, Ireland       | 2/2002–12/2003  | 40         | 33 (18–69)      | 43           | IBD (CD 28, UC 10, IC 2) | 5-ASA, 36; steroids, 34                                                          | Fair |
|                       | Saleem et al.[67]      | 2013             | Conference abstract | Retrospective cohort | Single-centre, UK            | Not reported    | 12         | 37 mean (19–62) | 42           | IBD (CD 6, UC 6)         | Not reported                                                                     | n/a  |
| Teml et al. 2007      | Almer et al.[68]       | 2007             | Conference abstract | Prospective cohort   | Single-centre, Sweden        | Not reported    | 23         | 41 (19–65)      | 57           | IBD (CD)                 | Not reported                                                                     | Fair |
|                       | Almer et al.[69]       | 2009             | Original article    | Prospective cohort   | Single-centre, Sweden        | 12/2000–1/2004  | 23         | 41 (19–65)      | 57           | IBD (CD)                 | 5-ASA 8; INF, 1; steroids, 15                                                    |      |
|                       | Bernstein et al.[70]   | 2002             | Conference abstract | Retrospective cohort | Single-centre                | Not reported    | 28         | Not reported    | 57           | IBD (CD 22, UC 6)        | Not reported                                                                     | n/a  |
|                       | Bokemeyer et al.[71]   | 2003             | Original article    | Prospective cohort   | Single-centre, Germany       | Not reported    | 11         | Not reported    | Not reported | IBD                      | INF, tacrolimus                                                                  | Fair |
|                       | Bonaz et al.[72]       | 2002             | Conference abstract | Prospective cohort   | Not reported                 | Not reported    | 28         | 32              | 14           | IBD (CD)                 | Not reported                                                                     | Fair |
|                       | Bonaz et al.[73]       | 2003             | Original article    | Prospective cohort   | Multi-centre, France/Belgium | 12/2000–2/2002  | 49         | 32 (19–55)      | 27           | IBD (CD)                 | Budesonide, 5; INF, 11; prednisone 21                                            |      |
|                       | Herrlinger et al.[15]  | 2002             | Conference abstract | Prospective cohort   | Germany                      | Not reported    | 35         | Not reported    | Not reported | IBD (CD)                 | Not reported                                                                     | Fair |
|                       | Herrlinger et al.[74]  | 2003             | Original article    | Prospective cohort   | Germany                      | Not reported    | 16         | 35 (22–58)      | 31           | IBD (CD)                 | Prednisone, 6                                                                    |      |
|                       | Herrlinger et al.[75]  | 2003             | Conference abstract | Prospective cohort   | Germany                      | Not reported    | 16         | Not reported    | Not reported | IBD (CD)                 | Not reported                                                                     |      |
|                       | Herrlinger et al.[76]  | 2003             | Original article    | Prospective cohort   | Multi-centre, Germany        | Not reported    | 37         | 36 (22–61)      | 38           | IBD (CD)                 | 5-ASA; steroids, 27                                                              |      |
| Herrlinger et al.[77] | 2004                   | Original article | Prospective cohort  | Germany              | Not reported                 | 26              | 35 (22–57) | 0               | IBD (CD)     | 5-ASA; steroids          |                                                                                  |      |

|                           |                         |      |                      |                      |                                                                                        |                 |     |                                                |              |                           |                                                            |                 |
|---------------------------|-------------------------|------|----------------------|----------------------|----------------------------------------------------------------------------------------|-----------------|-----|------------------------------------------------|--------------|---------------------------|------------------------------------------------------------|-----------------|
|                           | Klugman et al.[78]      | 2005 | Original article     | Retrospective cohort | Not reported                                                                           | 2001            | 23  | Not reported                                   | Not reported | IBD (CD 19, UC 4)         | Not reported                                               | Fair            |
|                           | Seiderer et al.[79]     | 2004 | Conference abstract  | Prospective cohort   | Multi-centre                                                                           | Not reported    | 22  | 18–58                                          | Not reported | IBD (CD 15, UC 7)         | Not reported                                               | Fair            |
|                           | Seiderer et al.[80]     | 2005 | Original article     | Prospective cohort   | Multi-centre, Germany, Czech Republic, Austria                                         | Not reported    | 45  | 37 (20–73)                                     | 44           | IBD (CD 32, UC 11, IC 2)  | Steroids, 15                                               |                 |
|                           | Teml et al.[81]         | 2003 | Conference abstract  | Prospective cohort   | Not reported                                                                           | Not reported    | 20  | Not reported                                   | Not reported | IBD (UC 14, IC 6)         | Steroids                                                   | Poor            |
|                           | Teml et al.[82]         | 2005 | Original article     | Prospective cohort   | Multi-centre, Germany, Austria                                                         | 8/2001–3/2002   | 20  | 45 (19–73)                                     | 35           | IBD (UC 14, IC 6)         | 5-ASA, 6; cyclosporine, 2; INF, 2; steroids, 15            |                 |
|                           | Teml et al.[83]         | 2005 | Conference abstract  | Retrospective cohort | Not reported                                                                           | Not reported    | 69  | Not reported                                   | Not reported | IBD (CD 50, UC 14, IC 5)  | Steroids, 49                                               |                 |
|                           | Teml et al.[19]         | 2007 | Original article     | Prospective cohort   | Multi-centre, Germany, Austria, Netherlands, Sweden, Czech Republic, France, Australia | 11/2001–12/2004 | 296 | 37 (16–82)                                     | 40           | IBD (CD 239, UC 48, IC 9) | 5-ASA, 95; INF, 65; steroids, 171                          |                 |
|                           | Zech et al.[84]         | 2007 | Original article     | Prospective cohort   | Multi-centre, Germany, Austria                                                         | Not reported    | 31  | 40 mean (20–73)                                | 39           | IBD (CD 19, UC 10, IC 2)  | Not reported                                               | Fair            |
|                           | Harrer et al.[85]       | 2003 | Conference abstract  | Prospective cohort   | Not reported                                                                           | Not reported    | 45  | Not reported                                   | Not reported | IBD (CD)                  | Not reported                                               | See Teml et al. |
|                           | Thomson et al.[14]      | 2004 | Original article     | Prospective cohort   | Multi-centre, USA                                                                      | 5/1997–5/2001   | 30  | 5 (1–16)                                       | 57           | ALL                       | MTX, VCR                                                   | Fair            |
| UK MRC ALL 97 & 97/99     | Piel et al.[86]         | 2004 | Letter to the editor | Retrospective cohort | Single center, UK                                                                      | 2002            | 59  | Not reported                                   | 57           | ALL                       | Not reported                                               | See S4 Appendix |
|                           | Ramanujachar et al.[87] | 2007 | Original article     | Retrospective cohort | Multi-centre, UK                                                                       | 1997–2002       | 128 | 16 (15–17)                                     | 62           | ALL                       | MTX, steroid (randomised: prednisolone/dexamethasone), VCR |                 |
|                           | Ravikumara et al.[88]   | 2005 | Conference abstract  | Retrospective cohort | Multi-centre, UK                                                                       | 10/1997–3/2004  | 9   | 11 (5–15)                                      | 78           | ALL                       | Not reported                                               |                 |
|                           | Ravikumara et al.[89]   | 2006 | Original article     | Retrospective cohort | Multi-centre, UK                                                                       | 12/2001–2/2005  | 75  | 11 (6–15)                                      | 70           | ALL                       | Not reported                                               |                 |
|                           | Roy Moulik et al.[90]   | 2015 | Conference abstract  | Retrospective cohort | Single-centre, UK                                                                      | Not reported    | 59  | Not reported                                   | 73           | ALL                       | Not reported                                               |                 |
|                           | Roy Moulik et al.[13]   | 2017 | Original article     | Retrospective cohort | Single-centre, UK                                                                      | Not reported    | 59  | 7 (2–14)                                       | 73           | ALL                       | Not reported                                               |                 |
| Van Asseldonk et al. 2016 | De Boer et al.[91]      | 2005 | Original article     | Retrospective cohort | Single-centre, Netherlands                                                             | 8/2002–11/2004  | 25  | Female, 40 mean (SD 12); male, 42 mean (SD 13) | 44           | IBD (CD 12, UC 5)         | None                                                       | Fair            |
|                           | De Boer et al.[92]      | 2005 | Original article     | Retrospective cohort | Multi-centre, Netherlands                                                              | 6/2001–7/2003   | 95  | 43 (mean, 20–74)                               | 39           | IBD (CD 53, UC            | None                                                       |                 |

|                  |                           |      |                     |                      |                            |                |     |                 |              |                    |                                                             |
|------------------|---------------------------|------|---------------------|----------------------|----------------------------|----------------|-----|-----------------|--------------|--------------------|-------------------------------------------------------------|
|                  |                           |      |                     |                      |                            |                |     |                 | 42)          |                    |                                                             |
|                  | De Boer et al.[93]        | 2005 | Conference abstract | Retrospective cohort | Not reported               | Not reported   | 95  | Not reported    | Not reported | IBD                | Not reported                                                |
|                  | De Boer et al.[94]*       | 2007 | Original article    | Prospective cohort   | Netherlands                | Not reported   | 7   | 42 (20–54)      | 14           | IBD (CD)           | None                                                        |
|                  | De Boer et al.[95]        | 2007 | Conference abstract | Prospective cohort   | Netherlands                | Not reported   | 30  | Not reported    | 57           | IBD (CD 17, UC 13) | Not reported                                                |
|                  | De Boer et al.[96]        | 2008 | Original article    | Prospective cohort   | Multi-centre, Netherlands  | 2001–2002      | 29  | 44 (22–68)      | 61           | IBD (CD 17, UC 11) | INF, 6; mesalazine, 16; prednisone, 11                      |
|                  | De Jong et al.[97]        | 2002 | Conference abstract | Prospective cohort   | Netherlands                | Not reported   | 31  | Not reported    | Not reported | IBD                | Not reported                                                |
|                  | Derijks et al.[98]        | 2002 | Conference abstract | Prospective cohort   | Netherlands                | Not reported   | 9   | 41 mean (24–59) | 33           | IBD (CD 5, UC 4)   | Not reported                                                |
|                  | Derijks et al.[99]        | 2003 | Original article    | Prospective cohort   | Multi-centre, Netherlands  | Not reported   | 32  | 37 mean (19–64) | 22           | IBD (CD 22, UC 10) | None                                                        |
|                  | Derijks et al.[100]*      | 2006 | Original article    | Prospective cohort   | Multi-centre, Netherlands  | 5/2001–11/2003 | 28  | 38 mean (19–70) | 21           | IBD (CD 16, UC 12) | 5-ASA, 23; steroids                                         |
|                  | Gilissen et al.[101]      | 2007 | Original article    | Prospective cohort   | Single-centre, Netherlands | Not reported   | 13  | 41 (28–53)      | 23           | IBD (CD 8, UC 5)   | Not reported                                                |
|                  | Jharap et al.[102]        | 2007 | Conference abstract | Retrospective cohort | Multi-centre, Netherlands  | Not reported   | 73  | 45 (22–72)      | 47           | IBD (68)           | Not reported                                                |
|                  | Van Asseldonk et al.[103] | 2009 | Conference abstract | Retrospective cohort | Multi-centre, Netherlands  | Not reported   | 122 | Not reported    | Not reported | IBD (CD 65, UC 57) | Not reported                                                |
|                  | Van Asseldonk et al.[104] | 2009 | Conference abstract | Retrospective cohort | Multi-centre, Netherlands  | Not reported   | 113 | 38 (16–62)      | 37           | IBD (CD 62, UC 51) | Not reported                                                |
|                  | Van Asseldonk et al.[9]*  | 2010 | Original article    | Cross-over study     | Netherlands                | Not reported   | 18  | 45 mean (SD 11) | 17           | IBD (CD 6, UC 12)  | Not reported                                                |
|                  | Van Asseldonk et al.[105] | 2010 | Conference abstract | Prospective cohort   | Multi-centre, Netherlands  | Not reported   | 99  | 44 mean (SD 12) | 36           | IBD (CD 61, UC 38) | Not reported                                                |
|                  | Van Asseldonk et al.[106] | 2010 | Conference abstract | Retrospective cohort | Not reported               | Not reported   | 11  | 50 mean (SD 13) | 27           | IBD (CD 5, UC 6)   | Not reported                                                |
|                  | Van Asseldonk et al.[107] | 2011 | Original article    | Retrospective cohort | Multi-centre, Netherlands  | 2001–2007      | 46  | 38 (19–71)      | 50           | IBD (UC)           | 5-ASA, 36; CYC, 7; INF, 7; steroids, 38; tacrolimus, 1      |
|                  | Van Asseldonk et al.[108] | 2012 | Original article    | Retrospective cohort | Single-centre, Netherlands | 1/2006–7/2010  | 19  | Mean 44 (SD 11) | 26           | IBD (CD 7, UC 12)  | 5-ASA, 8; adalimumab, 1; steroids, 7                        |
|                  | Van Asseldonk et al.[109] | 2014 | Conference abstract | Retrospective cohort | Multi-centre, Netherlands  | Not reported   | 23  | Not reported    | 39           | IBD                | Not reported                                                |
|                  | Van Asseldonk et al.[21]  | 2016 | Original article    | Retrospective cohort | Multi-centre, Netherlands  | 2002–2014      | 111 | 44 (SD 13)      | 38           | IBD (CD 69, UC 42) | Adalimumab, 2; CYC, 1; INF, 18; steroids, 40; tacrolimus: 4 |
| Ward et al. 2017 | Ansari et al.[110]        | 2008 | Original article    | Retrospective cohort | Single-centre, UK          | 2001–2006      | 30  | 34 (12–57)      | 40           | IBD (CD)           | Steroids                                                    |

|                     |      |                     |                      |                   |               |    |                |              |                         |               |
|---------------------|------|---------------------|----------------------|-------------------|---------------|----|----------------|--------------|-------------------------|---------------|
| Elliott et al.[111] | 2007 | Conference abstract | Retrospective cohort | Not reported      | 2001–2006     | 29 | Not reported   | Not reported | IBD (CD)                | Steroids      |
| Patel et al.[112]   | 2013 | Conference abstract | Retrospective cohort | Single-centre, UK | 2008–2012     | 37 | 43 mean        | 41           | IBD (CD 29, UC 6, IC 1) | Adalimumab, 1 |
| Soon et al.[113]    | 2004 | Conference abstract | Prospective cohort   | Single-centre, UK | Not reported  | 25 | Not reported   | Not reported | IBD (CD)                | INF, steroids |
| Ward et al.[114]    | 2013 | Conference abstract | Retrospective cohort | Single-centre, UK | 1/2001–1/2013 | 55 | Not reported   | 45           | IBD (CD 46)             | Not reported  |
| Ward et al.[22]     | 2017 | Original article    | Retrospective cohort | Single-centre, UK | 2001–2013     | 54 | 35 (IQR 27-49) | 35           | IBD (CD 47, UC 7)       | Anti-TNF, 18  |

5-ASA; 5-amino salicylic acid; AZA, azathioprine; ALL, acute lymphoblastic leukaemia; CD, Crohn's disease; CIVI, continuous intravenous infusion; IBD, inflammatory bowel disease; INF, infliximab; IC, indeterminate colitis; MTX, methotrexate; n/a, not applicable; UC, ulcerative colitis; VCR, vincristine; TNF, tumour necrosis factor.

\* Studies only concerning pharmacokinetics

† Abnormal liver chemistry and/or evidence of haematologic toxicity attributable to 6TG therapy.[17]

**Table C. Study characteristics of included case reports**

| Study                      | Report                   | Year | Setting                    | Number of patients | Age, years median (range) | Gender, % male | Disease | Concomitant therapy                                  | Risk of bias    |
|----------------------------|--------------------------|------|----------------------------|--------------------|---------------------------|----------------|---------|------------------------------------------------------|-----------------|
|                            | Bisschop et al.[115]     | 2001 | Single center, France      | 1                  | 10                        | 0              | ALL     | Not reported                                         | n/a             |
| CCG-1952                   | Broxson et al.[116]      | 2001 | Single center, USA         | 12                 | 1.5–7.25                  | Not reported   | ALL     | MTX, prednisone, VCR                                 | See S4 Appendix |
|                            | Broxson et al.[25]       | 2005 | Single center, USA         | 12                 | 6 (3–10)                  | 67             | ALL     | MTX, prednisone, VCR                                 |                 |
|                            | Chojnacki et al.[117]    | 2012 | Poland                     | 1                  | 14                        | 0              | IBD     | 5-ASA, prednisone                                    | n/a             |
|                            | De Boer et al.[118]      | 2005 | Single center, Netherlands | 8                  | Adult                     | 50             | IBD     | Not reported                                         | Fair            |
| UK MRC ALL 97/99           | De Bruyne et al.[23]     | 2006 | Single center, UK          | 6                  | 6.6 (3.25–11.5)           | 0.8            | ALL     | Steroid, VCR, MTX                                    | See S4 Appendix |
|                            | Rawat et al.[24]         | 2011 | Multicenter, UK            | 10                 | 17 (13–22)                | 0.7            | ALL     | Steroid, VCR, MTX                                    |                 |
|                            | Fritz et al.[119]        | 2008 | Single center, Austria     | 1                  | 56                        | 0              | IBD     | Prednisone 12.5 mg/day                               | Fair            |
|                            | Kane et al.[120]         | 2004 | Single center, USA         | 1                  | 40                        | 100            | IBD     | None                                                 | Fair            |
|                            | Mao et al.[121]          | 2013 | China                      | 2                  | 6–7                       | 50             | ALL     | VTLD, CAT, HDMTX                                     | n/a             |
|                            | Marasco et al.[122]      | 2016 | Single center, Italy       | 1                  | 50                        | 100            | IBD     | Not reported                                         | Fair            |
|                            | Mares et al.[123]        | 2009 | Single center, Netherlands | 1                  | 34                        | 100            | IBD     | Infliximab                                           | Poor            |
|                            | Wong et al.[124]         | 2009 | Single center              | 1                  | 33                        | 100            | IBD     | Infliximab 5 mg/kg every 8 weeks                     |                 |
|                            | Merino et al.[125]       | 2000 | Single center, Spain       | 1                  | 4                         | 100            | ALL     | MTX (weekly), silybum marianum (herbal remedy)       | Fair            |
|                            | Nielsen et al.[126]      | 2015 | Single center, Denmark     | 1                  | 8                         | 0              | ALL     | MTX, 6MP, VCR, dexamethasone, cytarabine, prednisone | Fair            |
|                            | Radys et al.[127]        | 2006 | Poland                     | 1                  | 14                        | 0              | IBD     | None                                                 | n/a             |
|                            | Rulyak et al.[128]       | 2003 | Single center, USA         | 1                  | 27                        | 0              | IBD     | Prednisone 40 mg/d                                   | Poor            |
|                            | Salerno et al.[129]      | 2014 | Single center, Italy       | 1                  | 44                        | 100            | IBD     | None                                                 | Fair            |
| Dubinsky et al. 2003       | Shastri et al.[130]      | 2002 | Single center, USA         | 3                  | Not reported              | Not reported   | IBD     | Not reported                                         | See Table B     |
|                            | Shastri et al.[131]      | 2004 | USA                        | 3                  | 36 (33–39)                | 100            | IBD     | 5-ASA n=1                                            |                 |
| Van den Berg et al. 2016   | De Boer et al.[132]      | 2005 | Netherlands                | 2                  | 23–24                     | 0              | IBD     | Case 1: none, case 2: prednisone 40 mg/d             | Fair            |
|                            | Van den Berg et al.[133] | 2016 | Multicentre, Netherlands   | 13                 | 20 (IQR 17–22)            | 0              | IBD     | Anti-TNF-a n=2, 5-ASA n=2, steroid n=4               |                 |
| Ivatinovic et al. 2004[61] | Wenzl et al.[134]        | 2004 | Single center, Austria     | 1                  | 36                        | 0              | IBD     | Not reported                                         | See Table B     |

5-ASA, 5-aminosalicylic acid; 6-MP, 6-mercaptopurine; ALL, acute lymphoblastic leukaemia; HDMTX, high-dose methotrexate; IBD, inflammatory bowel disease; MTX, methotrexate; VCR, vincristine.

**Table D. Results of randomised controlled trials**

| Trial                   | Report                 | Year | Duration of 6TG (months), median (range) | Dose of 6TG (mg/m <sup>2</sup> /d), median (range) | Ery-TGN pmol/8·10 <sup>8</sup> RBC, median (range)                                                                                                                   | Incidence of hepatotoxicity 6TG group in MT, n (%) | Follow-up (years), median (range) | Biopsy, n (% of 6TG group) | Other diagnostic methods, n (% of 6TG group)          | Truncation of 6TG due to hepatotoxicity, n (% of 6TG group) |
|-------------------------|------------------------|------|------------------------------------------|----------------------------------------------------|----------------------------------------------------------------------------------------------------------------------------------------------------------------------|----------------------------------------------------|-----------------------------------|----------------------------|-------------------------------------------------------|-------------------------------------------------------------|
| ALL-REZ BFM 87          | Einsiedel et al.[1]    | 2005 | Group A+B, 24; group C, 12               | 50                                                 | Not reported                                                                                                                                                         | Not reported                                       | 15                                | Not reported               | Not reported                                          | Not reported                                                |
| CCG-1952                | Matloub et al.[26]     | 2006 | Girls 26, boys 38                        | 50–60                                              | Not reported                                                                                                                                                         | Not reported                                       | 6.0                               | Not reported               | Not reported                                          | Not reported                                                |
|                         | Stork et al.[27]       | 1998 |                                          | 50–60                                              | Not reported                                                                                                                                                         | (6)                                                | Not reported                      | 5                          | Doppler US, 20                                        | Not reported                                                |
|                         | Stork et al.[28]       | 2002 |                                          | 50–60                                              | Not reported                                                                                                                                                         | 200 (20)                                           | Not reported                      | Not reported               | Not reported                                          | 200 (20)                                                    |
|                         | Stork et al.[5]        | 2002 | 22 (mean)                                | 50–60                                              | Patients with splenomegaly (n=6), 326 (mean, range 144-464); other patients on TG (n=20), 306 (mean, range 104-1021); patients on MP (n=20), 53 (mean, range 27-113) | 44 (4)                                             | Not reported                      | 12 (1)                     | Doppler US, MRI/MRA and/or upper GI endoscopy, 13 (1) | Not reported                                                |
|                         | Stork et al.[2]        | 2010 | Girls 24, boys 36 from first IM          | 50–60                                              | Not reported                                                                                                                                                         | 257 (25)                                           | 7.0                               | 8 (1)                      | Doppler US, 168 (17)                                  | 257 (25)                                                    |
| CO ALL-92               | Erb et al.[29]*        | 1998 | 18                                       | 50–100                                             | 2538 (511–5384)                                                                                                                                                      | Not reported                                       | 2.3                               | Not reported               | Not reported                                          | Not reported                                                |
|                         | Harms et al.[30]       | 2000 | Not reported                             | Not reported                                       | Not reported                                                                                                                                                         | Not reported                                       | 4.9 (2.1–7.6)                     | Not reported               | Not reported                                          | Not reported                                                |
|                         | Harms et al.[3]        | 2003 | 24                                       | 36, mean                                           | Not reported                                                                                                                                                         | 0                                                  | 6.6                               | Not reported               | Not reported                                          | Not reported                                                |
| UK MRC ALL 97/ Pilot    | Lancaster et al.[31]   | 1998 | 12 (7–19)                                | 4, mean (2–9)                                      | 2168 (790–7090)                                                                                                                                                      | 0                                                  | Not reported                      | Not reported               | Not reported                                          | Not reported                                                |
|                         | Stoneham et al.[6]     | 2003 | >12                                      | 34–35                                              | SOS, 1592 (1240–1965); no SOS, 1647 (1231–1979)                                                                                                                      | 12 (19)                                            | Not reported                      | 1 (2)                      | Doppler US, 10 (16)                                   | 10 (16)                                                     |
| UK MRC ALL97 & UKALL XI | Hann et al.[32]        | 2000 | 23                                       | 40                                                 | Not reported                                                                                                                                                         | Not reported                                       | 4.0 (0.4–8.0)                     | Not reported               | Not reported                                          | Not reported                                                |
| UK MRC ALL 97 & 97/99   | Cartwright et al.[33]  | 2008 | Girls 24, boys 36 from first IM          | 40                                                 | 1734 (759–4002)                                                                                                                                                      | Not reported                                       | 6.1 (3.5–9.7)                     | Not reported               | Not reported                                          | Not reported                                                |
|                         | Cartwright et al.[34]* | 2011 |                                          | 40                                                 | Not reported                                                                                                                                                         | Not reported                                       | Not reported                      | Not reported               | Not reported                                          | Not reported                                                |
|                         | Lancaster et al.[35]*  | 2002 |                                          | 43 (36–58)                                         | 1472 (1045–2459)                                                                                                                                                     | Not reported                                       | Not reported                      | Not reported               | Not reported                                          | Not reported                                                |
|                         | Lennard et al.[36]     | 2001 |                                          | 40                                                 | 1372 (659–2459)                                                                                                                                                      | Not reported                                       | Not reported                      | Not reported               | Not reported                                          | Not reported                                                |

|  |                     |      |  |              |                                                                         |              |                |              |                            |              |
|--|---------------------|------|--|--------------|-------------------------------------------------------------------------|--------------|----------------|--------------|----------------------------|--------------|
|  | Lennard et al.[37]  | 2003 |  | 40 (34–60)   | 1952 (1162–5414)                                                        | 65 (9)       | 2.8            | Not reported | Not reported               | Not reported |
|  | Lennard et al.[38]  | 2005 |  | 40           | Not reported                                                            | 82 (11)      | Not reported   | Not reported | Not reported               | Not reported |
|  | Lennard et al.[39]  | 2006 |  | 40           | SOS, 2034 (682–4072); control on TG, 1916 (718–3786)                    | 83 (11)      | 4.6            | Not reported | Not reported               | 83 (11)      |
|  | Lennard et al.[40]  | 2008 |  | 40 (10–78)   | 1940 (36–6874)                                                          | Not reported | Not reported   | Not reported | Not reported               | Not reported |
|  | Lennard et al.[41]  | 2008 |  | 40 (10–78)   | 1940 (36–6874)                                                          | Not reported | Not reported   | Not reported | Not reported               | Not reported |
|  | Lennard et al.[42]* | 2013 |  | 40 (10–78)   | 1940 (36–6874)                                                          | Not reported | Not reported   | Not reported | Not reported               | Not reported |
|  | Lennard et al.[43]* | 2015 |  | 40 (14–78)   | WT TPMT, 1904 (36–4336); heterozygenous TPMT, 2468 (174–6730)           | Not reported | Not reported   | Not reported | Not reported               | Not reported |
|  | Mitchell et al.[44] | 2002 |  | Not reported | Not reported                                                            | Not reported | 2.3            | Not reported | Not reported               | Not reported |
|  | Mitchell et al.[45] | 2009 |  | 40           | Not reported                                                            | Not reported | 8.0 (5.0–11.0) | Not reported | Not reported               | Not reported |
|  | Mitchell et al.[46] | 2010 |  | 40           | Not reported                                                            | 85 (11)      | 6.0–11.0       | Not reported | Not reported               | Not reported |
|  | Vora et al.[47]     | 2002 |  | 40 (34–60)   | 40 mg/m <sup>2</sup> , 1860 (n=225); 50 mg/m <sup>2</sup> , 2204 (n=72) | 40 (6)       | 2.3            | Not reported | Not reported               | Not reported |
|  | Vora et al.[4]      | 2006 |  | 40           | Not reported                                                            | 68 (9)       | 6.0            | 10 (1)       | Upper GI endoscopy, 12 (2) | 68 (9)       |

6TG, 6-thioguanine; GI, gastro intestinal; IM, interim maintenance; MRA, magnetic resonance angiography; MRI, magnetic resonance imaging; MT, maintenance; PY, patient year; US, ultrasound.

Doses in mg/m<sup>2</sup> were calculated with the assumption that an adult is 1.73 m<sup>2</sup>

\* Studies only concerning pharmacokinetics or TPMT activity

**Table E. Results of observational studies**

| Study                | Report              | Year | Duration of 6TG (months), median (range)                           | Dose of 6TG (mg/m <sup>2</sup> /day), median (range)                         | Cumulative dose of 6TG (g), median (range) | Ery-TGN pmol/8*10 <sup>8</sup> RBC, median (range)                                                               | Incidence of hepatotoxicity, n (%) | Follow-up, median (range) | Biopsy, n (% of total)                    | Other diagnostic methods than biopsy + n (% of total) | Dose reduction of 6TG due to hepatotoxicity, n (% of total) | Truncation of 6TG due to hepatotoxicity, n (% of total) |
|----------------------|---------------------|------|--------------------------------------------------------------------|------------------------------------------------------------------------------|--------------------------------------------|------------------------------------------------------------------------------------------------------------------|------------------------------------|---------------------------|-------------------------------------------|-------------------------------------------------------|-------------------------------------------------------------|---------------------------------------------------------|
| CCG-1942             | Jacobs et al.[48]   | 2005 | Not reported                                                       | 60–480 (oral, 60; CIVI; 480 over 24 hours every 8 weeks of first year of MT) | Not reported                               | 570 (72–2682)                                                                                                    | 6 (10)                             | 9 years                   | Not reported                              | Not reported                                          | Not reported                                                | 6 (10)                                                  |
|                      | Jacobs et al.[11]   | 2007 | 17 (12–26)                                                         | 60–480 (oral, 60; CIVI; 480 over 24 hours every 8 weeks of first year of MT) | Not reported                               | 2 weeks after MT cycle 1, 432 (72–1920); 2 weeks after MT cycle 2, 492 (132–2682); end of CIVI, 3906 (1980–7644) | 30 (52)                            | 9 (2–9) years             | Not reported                              | US, 6 (10)                                            | Not reported                                                | 6 (10)                                                  |
| CCG-1952             | Lowe et al.[49]*    | 2001 | 36                                                                 | 60–480 (oral, 60; CIVI; 480 over 24 hours every 8 weeks of first year of MT) | Not reported                               | 7 days after CIVI, 1344 (SD 600); after daily oral 6TG, 643 (SD 492)                                             | Not reported                       | Not reported              | Not reported                              | Not reported                                          | Not reported                                                | Not reported                                            |
|                      | Wray et al.[12]     | 2014 | Not reported                                                       | 50–60                                                                        | Not reported                               | Not reported                                                                                                     | 79 (23)                            | Not reported              | Not reported                              | Not reported                                          | Not reported                                                | Not reported                                            |
|                      | Cheung et al.[50]   | 2003 | 4 (1–5)                                                            | 23                                                                           | Not reported                               | Not reported                                                                                                     | 0                                  | 16 (3–21) weeks           | Not reported                              | Not reported                                          | Not reported                                                | Not reported                                            |
| Deibert et al. 2003  | Deibert et al.[8]*  | 2003 | Three single doses of 6TG with wash-out periods of at least 7 days | 29 mean (SD 0.6)                                                             | Not reported                               | Not reported                                                                                                     | Not reported                       | Not reported              | Not reported                              | Not reported                                          | Not reported                                                | Not reported                                            |
|                      | Deibert et al.[51]* | 2003 | Three single doses of 6TG                                          | 23                                                                           | Not reported                               | Not reported                                                                                                     | Not reported                       | Not reported              | Not reported                              | Not reported                                          | Not reported                                                | Not reported                                            |
| Dubinsky et al. 2003 | Dubinsky et al.[52] | 2000 | 4                                                                  | 23                                                                           | Not reported                               | Week 2, 743; week 4, 1045; week 16, 781                                                                          | 0                                  | 16 weeks                  | Not reported                              | Not reported                                          | Not reported                                                | Not reported                                            |
|                      | Dubinsky et al.[53] | 2001 | Not reported                                                       | 12 (6–23)                                                                    | Not reported                               | Not reported                                                                                                     | 0                                  | 2 weeks                   | Not reported                              | Not reported                                          | 0                                                           | Not reported                                            |
|                      | Dubinsky et al.[54] | 2001 | 4                                                                  | 23 (12–58)                                                                   | Not reported                               | 1388 (275–2073)                                                                                                  | 0                                  | 16 weeks                  | Not reported                              | Not reported                                          | 0                                                           | 0                                                       |
|                      | Dubinsky et al.[17] | 2003 | 9 (1–24)                                                           | 12 (6–23)                                                                    | Not reported                               | 1200 (680–2964)                                                                                                  | 0                                  | Not reported              | Not reported                              | Not reported                                          | 0                                                           | 0                                                       |
|                      | Dubinsky et al.[55] | 2003 | Group 1, 12 (1–26); group 2, 9 (1–28)                              | Not reported                                                                 | Group 1, 16 (1–34); group 2, 12 (1–36) mg  | Group 1, 1230 (502–2310); group 2, 1280 (510–2881)                                                               | 27 (24)                            | Not reported              | 26 (23) (17 from group 1, 9 from group 2) | Not reported                                          | Not reported                                                | Not reported                                            |
|                      | Dubinsky et al.[56] | 2003 | Not reported                                                       | Not reported                                                                 | Not reported                               | Not reported                                                                                                     | 27 (24)                            | Not reported              | 17 (15)                                   | Not reported                                          | Not reported                                                | Not reported                                            |



|                       |                        |      |                                                                                              |                                            |                                   |                                                                                                                                        |              |                  |              |                         |              |              |
|-----------------------|------------------------|------|----------------------------------------------------------------------------------------------|--------------------------------------------|-----------------------------------|----------------------------------------------------------------------------------------------------------------------------------------|--------------|------------------|--------------|-------------------------|--------------|--------------|
|                       | Geller et al.[57]      | 2003 | 12–36                                                                                        | Not reported                               | Not reported                      | Not reported                                                                                                                           | 16 (13)      | Not reported     | 32 (26)      | EM, 11 (9)              | Not reported | Not reported |
|                       | Geller et al.[58]      | 2004 | 12–36                                                                                        | Not reported                               | Not reported                      | Not reported                                                                                                                           | Not reported | Not reported     | 38 (34)      | EM, 23 (21)             | Not reported | Not reported |
|                       | Poordad et al.[16]     | 2002 | NRH, 15 (5–24); No NRH, 11 (2–17)                                                            | Not reported                               | NRH, 24 (3–34); No NRH, 23 (4–32) | NRH, 1323 (786–2150); No NRH, 1344 (736–2017)                                                                                          | 14 (11)      | Not reported     | 20 (16)      | Not reported            | Not reported | n/a          |
| Ferlitsch et al. 2007 | Ferlitsch et al.[59]   | 2005 | 38 (12–41)                                                                                   | At time of HVPG, 6 (3–23); max, 23 (12–46) | Not reported                      | Not reported                                                                                                                           | 5 (23)       | Not reported     | 22 (92)      | HVPG, 24 (100)          | Not reported | 5 (23)       |
|                       | Ferlitsch et al.[18]   | 2007 | 38 (12–45)                                                                                   | At time of HVPG, 6 (3–23); max, 23 (12–46) | 27 (7–56)                         | Not reported                                                                                                                           | 6 (23)       | 1 year           | 24 (92)      | HVPG, 26 (100)          | Not reported | 6 (23)       |
|                       | Hasyagar et al.[60]    | 2007 | 21 mean (2–72)                                                                               | Not reported                               | Not reported                      | Not reported                                                                                                                           | 2 (8)        | Not reported     | 2 (8)        | Not reported            | Not reported | 1 (4)        |
|                       | Ivastinovic et al.[61] | 2004 | 12 (6–27)                                                                                    | 23                                         | Not reported                      | 774 (244–1404)                                                                                                                         | 1 (8)        | 12 (6–27) months | 1 (8)        | Not reported            | Not reported | 1 (8)        |
| Jharap et al. 2011    | Jharap et al.[62]*     | 2008 | Two doses with 7 day interval, one oral and one 30 minute IV infusion                        | 0.3 mg/kg                                  | Not reported                      | Oral, 285 (30–563); IV, 902 (538–2275) (peak concentration)                                                                            | Not reported | Not reported     | Not reported | Not reported            | Not reported | Not reported |
|                       | Jharap et al.[10]*     | 2011 | Two doses with 7 day interval, one oral and one 30 minute IV infusion; 4 weeks in 8 patients | 12 (10–14)                                 | Not reported                      | Oral, 141 (30–563); IV, 902 (538–2006); steady state after 4 weeks, 1,215 (300–6070)                                                   | Not reported | Not reported     | Not reported | Not reported            | Not reported | Not reported |
|                       | Kornbluth et al.[63]   | 2002 | Not reported                                                                                 | 14 mean (6–34)                             | Not reported                      | 689 mean (353–820)                                                                                                                     | Not reported | Not reported     | Not reported | Not reported            | Not reported | Not reported |
|                       | Lancaster et al.[7]*   | 2001 | Two 4 week periods                                                                           | 40                                         | Not reported                      | 6 h (fasting), 295 (130–477); 6 h (food), 210 (103–544); steady state (fasting), 1742 (875–3026); steady state (food), 1600 (972–2894) | Not reported | Not reported     | Not reported | Not reported            | Not reported | Not reported |
|                       | Omer et al.[64]        | 2015 | 14 (1–40)                                                                                    | Not reported                               | Not reported                      | Not reported                                                                                                                           | 0            | Not reported     | Not reported | MRI                     | Not reported | 0            |
| Pavlidis et al. 2014  | Pavlidis et al.[65]    | 2014 | 8 (0–45)                                                                                     | Not reported                               | Not reported                      | Not reported                                                                                                                           | 2 (3)        | Not reported     | 9 (15)       | MRI, 2; US, 21          | 1 (2)        | 1 (2)        |
|                       | Pavlidis et al.[20]    | 2014 | 8 (0–45)                                                                                     | 0.6 mg/kg/d (0.3–1.0)                      | Not reported                      | 811 (340–2678)                                                                                                                         | 2 (3)        | 10 (0–45)        | 11 (18)      | MRI, 2 (3); US, 21 (34) | 1 (2)        | 1 (2)        |
|                       | Qasim et al.[66]       | 2007 | 8 (0–20)                                                                                     | 23                                         | Not reported                      | Not reported                                                                                                                           | 8 (20)       | 34 (2–90) weeks  | Not reported | US, 8 (20)              | n/a          | 8 (20)       |
|                       | Saleem et al.[67]      | 2013 | 8 (1–12)                                                                                     | 12                                         | Not reported                      | Not reported                                                                                                                           | 0            | 6 months         | Not reported | Not reported            | None         | None         |

|                  |                       |      |                |              |                |                                                                                   |              |                 |              |                                             |              |              |
|------------------|-----------------------|------|----------------|--------------|----------------|-----------------------------------------------------------------------------------|--------------|-----------------|--------------|---------------------------------------------|--------------|--------------|
| Teml et al. 2007 | Almer et al.[68]      | 2007 | 9 (1-48)       | 23 (12-35)   | Not reported   | Patients with AE (n=16), 652 (99-2488); patients without AE (n=7), 551 (392-1574) | 2 (9)        | Not reported    | Not reported | Not reported                                | Not reported | 2 (9)        |
|                  | Almer et al.[69]      | 2009 | 9 (1-48)       | 23 (12-35)   | Not reported   | Patients with AE (n=16), 652 (99-2488); patients without AE (n=7), 551 (392-1574) | 2 (9)        | Not reported    | 2 (9)        | CT, 3 (13); MR, 6 (26); US, 12 (52)         | 0            | 2 (9)        |
|                  | Bernstein et al.[70]  | 2002 | 4 mean (1-9)   | 12           | Not reported   | 546 (113-3114)                                                                    | Not reported | Not reported    | Not reported | Not reported                                | Not reported | Not reported |
|                  | Bokemeyer et al.[71]  | 2003 | Not reported   | 23           | Not reported   | Not reported                                                                      | Not reported | Not reported    | Not reported | Not reported                                | Not reported | 0            |
|                  | Bonaz et al.[72]      | 2002 | 3 mean (0-5)   | 12           | Not reported   | 750 mean (379-1240)                                                               | 1 (4)        | 3 mean (0-5)    | Not reported | Not reported                                | Not reported | 1 (4)        |
|                  | Bonaz et al. [73]     | 2003 | 7 (1-20)       | 12 (12-23)   | Not reported   | 648 (154-1316)                                                                    | 2 (4)        | 7 (1-20) months | Not reported | Not reported                                | Not reported | 2 (4)        |
|                  | Herrlinger et al.[15] | 2002 | 4              | 23 (23-46)   | Not reported   | Responders, 928 (SD 296); non-responders, 1005 (SD 428)                           | Not reported | 16 weeks        | Not reported | Not reported                                | Not reported | Not reported |
|                  | Herrlinger et al.[74] | 2003 | 12             | 23 (12-46)   | Not reported   | 1 month, 1265 (394-1853); 6 months, 1329 (865-2160); 12 months, 1067 (470-1631)   | 1 (6)        | 1 year          | 0            | Doppler US, 1 (6)                           | Not reported | 1 (6)        |
|                  | Herrlinger et al.[75] | 2003 | 12             | 12-23        | Not reported   | Not reported                                                                      | 1 (6)        | 1 year          | Not reported | Not reported                                | Not reported | 1 (6)        |
|                  | Herrlinger et al.[76] | 2003 | 5              | 23 (23-46)   | Not reported   | Not reported                                                                      | 2 (5)        | 24 weeks        | Not reported | Not reported                                | 0            | 0            |
|                  | Herrlinger et al.[77] | 2004 | 5              | 23 (23-46)   | Not reported   | 4 weeks, 1241 (313-1853); 12 weeks, 956 (430-2668)                                | 0            | 24 weeks        | Not reported | Not reported                                | Not reported | 0            |
|                  | Klugman et al.[78]    | 2005 | 23 mean (1-36) | 12-23        | 16 mean (1-37) | 40 mg/d, 800-1200; 20 mg/d, 337 mean (88-602)                                     | 5 (22)       | Not reported    | 5 (22)       | MRI, 13 (57); US control every three months | Not reported | 2 (9)        |
|                  | Seiderer et al.[79]   | 2004 | >6             | 6-23         | Not reported   | Not reported                                                                      | 5 (23)       | Not reported    | 22 (100)     | MRI, 22 (100)                               | Not reported | Not reported |
|                  | Seiderer et al.[80]   | 2005 | 16 (2-26)      | 23-46        | 16 (3-52)      | Not reported                                                                      | 16 (36)      | Not reported    | 45 (100)     | MRI, 31 (69)                                | Not reported | Not reported |
|                  | Teml et al.[81]       | 2003 | 6              | 12-23        | Not reported   | Not reported                                                                      | 4 (20)       | 26 weeks        | Not reported | Not reported                                | Not reported | Not reported |
|                  | Teml et al.[82]       | 2005 | 6              | 23 (12-46)   | Not reported   | 816 (279-2300)                                                                    | 5 (31)       | Not reported    | 1 (6)        | Not reported                                | Not reported | 1 (6)        |
| Teml et al.[83]  | 2005                  | 24   | 23 (12-46)     | Not reported | Not reported   | Not reported                                                                      | Not reported | Not reported    | Not reported | Not reported                                | Not reported |              |

|                           |                         |      |                           |                                             |                 |                                                                               |              |                                                                 |              |                                            |              |              |
|---------------------------|-------------------------|------|---------------------------|---------------------------------------------|-----------------|-------------------------------------------------------------------------------|--------------|-----------------------------------------------------------------|--------------|--------------------------------------------|--------------|--------------|
|                           | Teml et al.[19]         | 2007 | 12 (0–46)                 | 12 (12–23) after 93 weeks, starting dose 23 | Not reported    | Not reported                                                                  | 43 (15)      | 370 PY                                                          | 60 (20)      | CT, 16 (5); MRI, 53 (18); US, 149 (50)     | 12 (4)       | 10 (3)       |
|                           | Zech et al.[84]         | 2007 | 16 (5–26)                 | Not reported                                | 18 mean (7–52)  | Not reported                                                                  | 13 (42)      | Not reported                                                    | 31 (100)     | MRI, 31 (100)                              | Not reported | Not reported |
|                           | Harrer et al.[85]       | 2003 | 6                         | 23 (12–23)                                  | Not reported    | Not reported                                                                  | Not reported | Not reported                                                    | Not reported | Not reported                               | Not reported | Not reported |
|                           | Thomson et al.[14]      | 2004 | 3                         | 50                                          | Not reported    | Not reported                                                                  | 0            | 4 years                                                         | Not reported | Not reported                               | Not reported | Not reported |
| UK MRC ALL 97 & 97/99     | Piel et al.[86]         | 2004 | Not reported              | Not reported                                | Not reported    | Not reported                                                                  | 7 (12)       | 31 (18–54) months                                               | 4 (7)        | US, 4 (7)                                  | None         | 6 (10)       |
|                           | Ravikumara et al.[88]   | 2005 | Not reported              | Not reported                                | Not reported    | Not reported                                                                  | 9 (100)      | 26 (7–37) months                                                | 8 (89)       | Upper GI endoscopy, 9 (100); US, 9 (100)   | Not reported | Not reported |
|                           | Ravikumara et al.[89]   | 2006 | Boys, 27–31; girls, 16–20 | 40                                          | Not reported    | Not reported                                                                  | 10 (13)      | 30 (5–46) months                                                | 9 (90)       | Upper GI endoscopy, 10 (100); US, 10 (100) | Not reported | Not reported |
|                           | Roy Moulik et al.[90]   | 2015 | Not reported              | Not reported                                | Not reported    | Not reported                                                                  | 11 (19)      | 132 (72–168) months                                             | 4 (36)       | Upper GI endoscopy, 5 (45); US, 8 (73)     | Not reported | Not reported |
|                           | Roy Moulik et al.[13]   | 2017 | 28 weeks (2–150)          | Not reported                                | Not reported    | Not reported                                                                  | 11 (19)      | 107 PY                                                          | 4 (36)       | Upper GI endoscopy, 6 (55); US, 8 (73)     | Not reported | 6 (10)       |
|                           | Ramanujachar et al.[87] | 2007 | 24–36                     | Not reported                                | Not reported    | Not reported                                                                  | Not reported | Not reported                                                    | Not reported | Not reported                               | Not reported | n/a          |
| Van Asseldonk et al. 2016 | De Boer et al.[91]      | 2005 | 5.2 mean (SD 3.7)         | 12 (6–23)                                   | Not reported    | 621 mean (34–1653)                                                            | Not reported | Not reported                                                    | Not reported | Not reported                               | Not reported | Not reported |
|                           | De Boer et al.[92]      | 2005 | >12                       | 14 (12–23)                                  | Not reported    | Patients with AE, 725 mean (229–1563); patients without AE, 540 mean (0–1404) | 11 (12)      | 1 year                                                          | Not reported | US 51 (54)                                 | Not reported | 4 (4)        |
|                           | De Boer et al.[93]      | 2005 | Not reported              | 14                                          | Not reported    | 540 (mean)                                                                    | 10 (11)      | Not reported                                                    | 1 (1)        | US 51 (54)                                 | Not reported | 3 (3)        |
|                           | De Boer et al.[94]*     | 2007 | >1                        | 12                                          | Not reported    | 563 (158–858)                                                                 | Not reported | Not reported                                                    | Not reported | Not reported                               | Not reported | Not reported |
|                           | De Boer et al.[95]      | 2007 | 39 mean (30–53)           | 12                                          | 23 (mean 12–44) | 580 mean (106–1199)                                                           | 1 (3)        | >30 months                                                      | 30 (100)     | US, 30 (100)                               | Not reported | Not reported |
|                           | De Boer et al.[96]      | 2008 | 38 mean (30–53)           | 12 (3–23)                                   | 22 (SD 6)       | 564 (mean, SD 278)                                                            | 0            | 38 months (30–53 months) from initiation of 6TG to liver biopsy | 28 (100)     | Not reported                               | 0            | Not reported |
|                           | De Jong et al.[97]      | 2002 | 0–3                       | 12 (12–23)                                  | Not reported    | 20 mg/day, 790 (SD 374); 40 mg/day, 1393 (SD 752)                             | 1 (3)        | 12 weeks                                                        | Not reported | Not reported                               | Not reported | Not reported |

|                  |                           |      |                                |                      |               |                                                         |              |                  |              |                         |              |              |
|------------------|---------------------------|------|--------------------------------|----------------------|---------------|---------------------------------------------------------|--------------|------------------|--------------|-------------------------|--------------|--------------|
|                  | Derijks et al.[98]        | 2002 | 1                              | 12 (12–23)           | Not reported  | 986 (270–1666)                                          | Not reported | 4 weeks          | Not reported | Not reported            | Not reported | Not reported |
|                  | Derijks et al.[99]        | 2003 | 2                              | 15 mean (6–23)       | Not reported  | 20 mg/d, 937 mean (SD 325); 40 mg/d, 1621 mean (SD 828) | 0            | 8 weeks          | Not reported | Not reported            | Not reported | Not reported |
|                  | Derijks et al.[100]*      | 2006 | 2                              | 12                   | Not reported  | 848 mean (284–1888)                                     | 0            | 4–8 weeks        | Not reported | Not reported            | Not reported | Not reported |
|                  | Gilissen et al.[101]      | 2007 | 36 mean (27–45)                | 12 (4–12)            | Not reported  | 802 (106–1092)                                          | 0            | Not reported     | 13 (100)     | MRI, 11 (85)            | Not reported | Not reported |
|                  | Jharap et al.[102]        | 2007 | 34 (4–57)                      | 12 (10–14)           | Not reported  | Not reported                                            | Not reported | Not reported     | 73 (100)     | Not reported            | Not reported | Not reported |
|                  | Van Asseldonk et al.[103] | 2009 | 40                             | 0.3 mg/kg/d          | Not reported  | Not reported                                            | Not reported | Not reported     | Not reported | US                      | Not reported | Not reported |
|                  | Van Asseldonk et al.[104] | 2009 | 26 (1–72)                      | 0.3 mg/kg/d          | Not reported  | Not reported                                            | 1 (5)        | 245 PY           | 42 (37)      | Not reported            | Not reported | 1 (1)        |
|                  | Van Asseldonk et al.[9]*  | 2010 | Two doses oral/IV 7 days apart | 0.3 mg/kg            | Not reported  | Not reported                                            | Not reported | Not reported     | Not reported | Not reported            | Not reported | Not reported |
|                  | Van Asseldonk et al.[105] | 2010 | 25 (6–65)                      | 0.28 (SD 0.07) mg/kg | Not reported  | Not reported                                            | 4 (4)        | Not reported     | 99 (100)     | Not reported            | Not reported | Not reported |
|                  | Van Asseldonk et al.[106] | 2010 | 3 (1–18)                       | 12 (6–14)            | Not reported  | 1070 (390–2100)                                         | 2 (18)       | 3 (1–18)         | Not reported | Not reported            | Not reported | Not reported |
|                  | Van Asseldonk et al.[107] | 2011 | 22 (0–73)                      | 12 (10–14)           | Not reported  | 278 (68–492)                                            | 2 (4)        | 22 (0–73)        | 12 (26)      | US, 21 (46)             | Not reported | 2 (4)        |
|                  | Van Asseldonk et al.[108] | 2012 | 5 (1–21)                       | 12 (SD 2)            | Not reported  | 427 (126–800)                                           | 4 (21)       | 5 (1–21) months  | 2 (11)       | Not reported            | 0            | 0            |
|                  | Van Asseldonk et al.[109] | 2014 | 26 (14–54)                     | 12 (4–14)            | Not reported  | Not reported                                            | 0            | 26 (14–54)       | 23 (100)     | US                      | Not reported | Not reported |
|                  | Van Asseldonk et al.[21]  | 2016 | 20 (7–64)                      | 12 (SD 3)            | 13 (4–39)     | 464 (65–1199)                                           | 7 (6)        | Not reported     | 111 (100)    | CT, 2 (18); US, 76 (68) | Not reported | Not reported |
| Ward et al. 2017 | Ansari et al.[110]        | 2008 | 22 (0–62)                      | 23 (12–35)           | 23            | 807 (105–2545)                                          | 2 (7)        | 44 (3–62) months | 11 (37)      | MRI, 14 (47)            | Not reported | 2 (7)        |
|                  | Elliott et al.[111]       | 2007 | 22 (0–60)                      | 23 (12–34)           | Not reported  | Not reported                                            | 3 (10)       | 44 months        | 11 (38)      | MRI and US, 20 (69)     | Not reported | 3 (10)       |
|                  | Patel et al.[112]         | 2013 | 11 (IQR 3–30)                  | 12–23                | Not reported  | 1177 mean (70–3182)                                     | 1 (3)        | Not reported     | 9 (24)       | MRI, 9 (24)             | None         | 1 (3)        |
|                  | Soon et al.[113]          | 2004 | 6                              | 12–23                | Not reported  | Not reported                                            | 1 (4)        | Not reported     | Not reported | Not reported            | Not reported | 1 (4)        |
|                  | Ward et al.[114]          | 2013 | 14 (0–124)                     | 23 (12–35)           | 10 (0–210)    | 848 (149–2789)                                          | 1 (2)        | 169 PY           | Not reported | Not reported            | Not reported | Not reported |
|                  | Ward et al.[22]           | 2017 | 16 (IQR 5–37)                  | 16 mean (12–23)      | 13 (IQR 4–26) | 740 (IQR 445–1078)                                      | 3 (6)        | 126 PY           | 11 (20)      | MRI, 24 (44)            | Not reported | 2 (4)        |

6TG, 6-thioguanine; AE, adverse event; CIVI, continuous intravenous infusion; CSPH, clinical significant portal hypertension; CT, computed tomography; EM, electron microscopy; GI, gastro intestinal; HVPG, hepatic venous pressure gradient; IV, intra-venous; MRI, magnetic resonance imaging; MT, maintenance; PH, portal hypertension; PY, patient years; US, abdominal ultrasound.

Doses in  $\text{mg}/\text{m}^2$  were calculated with the assumption that an adult is  $1.73 \text{ m}^2$

**Table F. Results of case reports**

| Study                    | Report                   | Year | Duration of 6TG (months), median (range) | Dose of 6TG (mg/m <sup>2</sup> /day), median (range) | Incidence of hepatotoxicity, n (%) | Follow-up, median (range) | Biopsy, n (% of total) | Other diagnostic methods, n (% of total)             | Truncation of 6TG due to hepatotoxicity, n (% of total) |
|--------------------------|--------------------------|------|------------------------------------------|------------------------------------------------------|------------------------------------|---------------------------|------------------------|------------------------------------------------------|---------------------------------------------------------|
|                          | Bisschop et al.[115]     | 2001 | Not reported                             | n/a                                                  | 0                                  | Not reported              | Not reported           | Not reported                                         | 0                                                       |
| CCG-1952                 | Broxson et al.[116]      | 2001 | Not reported                             | 34 (25–77)                                           | 12 (100)                           | Not reported              | 3 (25)                 | MRI, 9 (75); US, 7 (58)                              | Not reported                                            |
|                          | Broxson et al.[25]       | 2005 | 20 (13–36)                               | 34 (25–77)                                           | 12 (100)                           | 7–44 months               | 3 (25)                 | MRI, 10 (83); Upper GI endoscopy, 4 (33); US, 5 (42) | 7 (50)                                                  |
|                          | Chojnacki et al.[117]    | 2012 | 5                                        | 35                                                   | 1 (100)                            | Not reported              | 0                      | Not reported                                         | n/a                                                     |
|                          | De Boer et al.[118]      | 2005 | 21 (16–36)                               | 12 (9–21)                                            | 0                                  | Not reported              | 8 (100)                | Not reported                                         | Not reported                                            |
| UK MRC ALL 97/99         | De Bruyne et al.[23]     | 2006 | 12 (6–22)                                | 40                                                   | 6 (100)                            | 23 (4–36) months          | 6 (100)                | US, 6 (100); upper GI endoscopy, 3 (50)              | 6 (100)                                                 |
|                          | Rawat et al.[24]         | 2011 | Not reported                             | n/a                                                  | 10 (100)                           | 65.7 PY                   | Not reported           | Upper GI endoscopy 10 (100)                          | Not reported                                            |
|                          | Fritz et al.[119]        | 2008 | 36                                       | 23                                                   | 1 (100)                            | 56 months                 | 1 (100)                | Not reported                                         | 1 (100)                                                 |
|                          | Kane et al.[120]         | 2004 | 13                                       | 23                                                   | 1 (100)                            | Not reported              | 1 (100)                | US, 1 (100); CT, 1 (100)                             | 1 (100)                                                 |
|                          | Mao et al.[121]          | 2013 | 0–1                                      | 111–125*                                             | 2 (100)                            | Not reported              | 0                      | Not reported                                         | Not reported                                            |
|                          | Marasco et al.[122]      | 2016 | Not reported                             | n/a                                                  | 1 (100)                            | Not reported              | 0                      | MRI, 1 (100)                                         | Not reported                                            |
| Mares et al. 2009        | Mares et al.[123]        | 2009 | 30                                       | 1–2                                                  | 0                                  | 30 months                 | 0                      | Not reported                                         | 0                                                       |
|                          | Wong et al.[124]         | 2009 | Not reported                             | 1–2                                                  | 0                                  | Not reported              | Not reported           | Not reported                                         | 0                                                       |
|                          | Merino et al.[125]       | 2000 | 4                                        | 75                                                   | 1 (100)                            | 8 months                  | 1 (100)                | Not reported                                         | 1 (100)                                                 |
|                          | Nielsen et al.[126]      | 2015 | 2                                        | 3–10                                                 | 0                                  | 5.9 years                 | 0                      | US, 1 (100)                                          | 0                                                       |
|                          | Radys et al.[127]        | 2006 | 1                                        | n/a                                                  | 1 (100)                            | Not reported              | 0                      | Not reported                                         | Not reported                                            |
|                          | Rulyak et al.[128]       | 2003 | 1                                        | 23                                                   | 1 (100)                            | 2 months                  | 0                      | CT, 1 (100)                                          | 1 (100)                                                 |
|                          | Salerno et al.[129]      | 2014 | 3                                        | 14–46                                                | 1 (100)                            | 3 months                  | 1 (100)                | US, 1 (100); CT, 1 (100)                             | 1 (100)                                                 |
| Dubinsky et al. 2003     | Shastri et al.[130]      | 2002 | 12                                       | n/a                                                  | 3 (100)                            | Not reported              | 3 (100)                | Not reported                                         | Not reported                                            |
|                          | Shastri et al.[131]      | 2004 | 17 (15–18)                               | n/a                                                  | 3 (100)                            | Not reported              | 3 (100)                | Not reported                                         | Not reported                                            |
| Van den Berg et al. 2016 | De Boer et al.[132]      | 2005 | 17–18                                    | 2–12                                                 | 0                                  | 17–18 months              | Not reported           | Not reported                                         | 0                                                       |
|                          | Van den Berg et al.[133] | 2016 | 33                                       | 5–10                                                 | 0                                  | Not reported              | Not reported           | Not reported                                         | Not reported                                            |

|                            |                   |      |    |    |         |         |   |             |         |
|----------------------------|-------------------|------|----|----|---------|---------|---|-------------|---------|
| Ivastic et al.<br>2004[61] | Wenzl et al.[134] | 2004 | 14 | 23 | 1 (100) | 7 weeks | 0 | US, 1 (100) | 1 (100) |
|----------------------------|-------------------|------|----|----|---------|---------|---|-------------|---------|

CT, computed tomography; MRI, magnetic resonance imaging; PY, patient years; US, abdominal ultrasound.

Doses in mg/m<sup>2</sup> were calculated with the assumption that an adult is 1.73 m<sup>2</sup>

\*Calculated using mean weight and height for a 6 and 7 year old child

## References

1. Einsiedel HG, von Stackelberg A, Hartmann R, Fengler R, Schrappe M, Janka-Schaub G, et al. Long-term outcome in children with relapsed ALL by risk-stratified salvage therapy: results of trial acute lymphoblastic leukemia-relapse study of the Berlin-Frankfurt-Munster Group 87. *J Clin Oncol.* 2005;23(31):7942–50.
2. Stork LC, Matloub Y, Broxson E, La M, Yanofsky R, Sather H, et al. Oral 6-mercaptopurine versus oral 6-thioguanine and veno-occlusive disease in children with standard-risk acute lymphoblastic leukemia: report of the Children's Oncology Group CCG-1952 clinical trial. *Blood.* 2010 Apr 8;115(14):2740–8.
3. Harms DO, Gobel U, Spaar HJ, Graubner UB, Jorch N, Gutjahr P, et al. Thioguanine offers no advantage over mercaptopurine in maintenance treatment of childhood ALL: Results of the randomized trial COALL-92. *Blood.* 2003;102(8):2736–40.
4. Vora A, Mitchell CD, Lennard L, Eden TOB, Kinsey SE, Lilleyman J, et al. Toxicity and efficacy of 6-thioguanine versus 6-mercaptopurine in childhood lymphoblastic leukaemia: a randomised trial. *Lancet.* 2006 Oct 14;368(9544):1339–48.
5. Stork LC, Broxson EH, Sather H, Gaynon P, Matloub YH, Yanosfsky R, et al. Oral 6-thioguanine causes late-onset splenomegaly and portal hypertension in a subset of children with acute lymphoblastic leukemia. *Gastroenterology.* 2002;123(1):59.
6. Stoneham S, Lennard L, Coen P, Lilleyman J, Saha V. Veno-occlusive disease in patients receiving thiopurines during maintenance therapy for childhood acute lymphoblastic leukaemia. *Br J Haematol.* 2003 Oct;123(1):100–2.
7. Lancaster DL, Patel N, Lennard L, Lilleyman JS. 6-Thioguanine in children with acute lymphoblastic leukaemia: Influence of food on parent drug pharmacokinetics and 6-thioguanine nucleotide concentrations. *Br J Clin Pharmacol.* 2001;51(6):531–9.



8. Deibert P, Dilger K, Fischer C, Hofmann U, Nauck S, Stoelben S, et al. High variation of thioguanine absorption in patients with chronic active Crohn's disease. *Aliment Pharmacol Ther.* 2003;18(2):183–9.
9. van Asseldonk DP, de Boer NK, Smid K, Mulder CJ, van Bodegraven AA, Peters GJ. Limited intra-individual variability in hypoxanthine-guanine phosphoribosyl transferase, thiopurine S-methyl transferase, and xanthine oxidase activity in inflammatory bowel disease patients during 6-thioguanine therapy. *Nucleosides, Nucleotides and Nucleic Acids.* 2010;29(4–6):284–90.
10. Jharap B, de Boer NK, Vos RM, Smid K, Zwiers A, Peters GJ, et al. Biotransformation of 6-thioguanine in inflammatory bowel disease patients: A comparison of oral and intravenous administration of 6-thioguanine. *Br J Pharmacol.* 2011;163(4):722–31.
11. Jacobs SS, Stork LC, Bostrom BC, Hutchinson R, Holcenberg J, Reaman GH, et al. Substitution of oral and intravenous thioguanine for mercaptopurine in a treatment regimen for children with standard risk acute lymphoblastic leukemia: A collaborative Children's Oncology Group/National Cancer Institute pilot trial (CCG-1942). *Pediatr Blood Cancer.* 2007;49(3):250–5.
12. Wray L, Vujkovic M, McWilliams T, Cannon S, Devidas M, Stork L, et al. TPMT and MTHFR genotype is not associated with altered risk of thioguanine-related sinusoidal obstruction syndrome in pediatric acute lymphoblastic leukemia: a report from the Children's Oncology Group. *Pediatr Blood Cancer.* 2014 Nov;61(11):2086–8.
13. Roy Moulik N, M Taj M. Long-term risk of portal hypertension and related complications in children treated with 6-thioguanine for acute lymphoblastic leukemia: A single-center experience. *Pediatr Blood Cancer.* 2017 Oct;64(10):e26495.
14. Thomson B, Park JR, Felgenhauer J, Meshinchi S, Holcenberg J, Geyer JR, et al. Toxicity

and efficacy of intensive chemotherapy for children with acute lymphoblastic leukemia (ALL) after first bone marrow or extramedullary relapse. *Pediatr Blood Cancer*. 2004;43(5):571–9.

15. Herrlinger KR, Kreisel W, Schwab M, Fischer C, Scholmerich J, Fleig WE, et al. Open prospective trial an 6-thioguanine for chronic active Crohn’s disease. *Gastroenterology*. 2002;122(4):A432.
16. Poordad, F.; Vasiliauskas, E.; Abreu, M.; Tran, T.; Martin, P.; Vierling, J.; Targan, S.; Geller, S.; Dubinsky MC. Nodular regenerative hyperplasia (NRH) of the liver associated with 6-thioguanine (6-TG) therapy in inflammatory bowel disease (IBD). *Hepatology*. 2002;36(4):333A.
17. Dubinsky MC, Vasiliauskas EA, Singh H, Abreu MT, Papadakis KA, Tran T, et al. 6-thioguanine can cause serious liver injury in inflammatory bowel disease patients. *Gastroenterology*. 2003 Aug;125(2):298–303.
18. Ferlitsch A, Teml A, Reinisch W, Ulbrich G, Wrba F, Homoncik M, et al. 6-Thioguanine associated nodular regenerative hyperplasia in patients with inflammatory bowel disease may induce portal hypertension. *Am J Gastroenterol*. 2007;102(11):2495–503.
19. Teml A, Schwab M, Hommes DW, Almer S, Lukas M, Feichtenschlager T, et al. A systematic survey evaluating 6-thioguanine-related hepatotoxicity in patients with inflammatory bowel disease. *Wien Klin Wochenschr*. 2007 Sep;119(17–18):519–26.
20. Pavlidis P, Ansari A, Duley J, Oancea I, Florin T. Splitting a therapeutic dose of thioguanine may avoid liver toxicity and be an efficacious treatment for severe inflammatory bowel disease: a 2-center observational cohort study. *Inflamm Bowel Dis*. 2014 Dec;20(12):2239–46.
21. van Asseldonk DP, Jharap B, Verheij J, den Hartog G, Westerveld DB, Becx MC, et al. The

Prevalence of Nodular Regenerative Hyperplasia in Inflammatory Bowel Disease Patients Treated with Thioguanine Is Not Associated with Clinically Significant Liver Disease. *Inflamm Bowel Dis*. 2016 Sep;22(9):2112–20.

22. Ward MG, Patel K V, Kariyawasam VC, Goel R, Warner B, Elliott TR, et al. Thioguanine in inflammatory bowel disease: Long-term efficacy and safety. *United Eur Gastroenterol J*. 2017 Jun;5(4):563–70.
23. De Bruyne R, Portmann B, Samyn M, Bansal S, Knisely A, Mieli-Vergani G, et al. Chronic liver disease related to 6-thioguanine in children with acute lymphoblastic leukaemia. *J Hepatol*. 2006 Feb;44(2):407–10.
24. Rawat D, Gillett PM, Devadason D, Wilson DC, McKiernan PJ. Long-term follow-up of children with 6-thioguanine-related chronic hepatotoxicity following treatment for acute lymphoblastic leukaemia. *J Pediatr Gastroenterol Nutr*. 2011 Nov;53(5):478–9.
25. Broxson EH, Dole M, Wong R, Laya BF, Stork L. Portal hypertension develops in a subset of children with standard risk acute lymphoblastic leukemia treated with oral 6-thioguanine during maintenance therapy. *Pediatr Blood Cancer*. 2005 Mar;44(3):226–31.
26. Matloub Y, Lindemulder S, Gaynon P, Sather H, La M, Broxson E, et al. Intrathecal triple therapy decreases central nervous system relapse but fails to improve event-free survival when compared with intrathecal methotrexate: results of the Children’s Cancer Group (CCG) 1952 study for standard-risk acute lymphoblastic leukemia. *Blood*. 2006;1165–73.
27. Stork L, Erdmaru G, Adamson P. Oral 6-Thioguanine causes relatively mild and reversible hepatic veno-occlusive disease. *J Pediatr Hematol Oncol*. 1998;20:400.
28. Stork LC, Sather H, Hutchinson R, Broxson E, Matloub Y, Yanofsky R. Comparison of mercaptopurine (MP) with thioguanine (TG) and IT methotrexate (ITM) with IT “Triples” (ITT) in children with SR-ALL: results of CCG-1952. Vol. 100, *Blood*. 2002. p. 156a.

29. Erb N, Harms DO, Janka-Schaub G. Pharmacokinetics and metabolism of thiopurines in children with acute lymphoblastic leukemia receiving 6-thioguanine versus 6-mercaptopurine. *Cancer Chemother Pharmacol.* 1998 Aug 12;42(4):266–72.
30. Harms DO, Janka-Schaub GE, Grp CS. Co-operative study group for childhood acute lymphoblastic leukemia (COALL): long-term follow-up of trials 82, 85, 89 and 92. *Leukemia.* 2000;14(12):2234–9.
31. Lancaster DL, Lennard L, Rowland K, Vora AJ, Lilleyman JS. Thioguanine versus mercaptopurine for therapy of childhood lymphoblastic leukaemia: a comparison of haematological toxicity and drug metabolite concentrations. *Br J Haematol.* 1998 Jul;102(2):439–43.
32. Hann I, Vora A, Richards S, Hill F, Gibson B, Lilleyman J, et al. Benefit of intensified treatment for all children with acute lymphoblastic leukaemia: results from MRC UKALL XI and MRC ALL97 randomised trials. UK Medical Research Council's Working Party on Childhood Leukaemia. *Leukemia.* 2000;14(3):356–63.
33. Cartwright C, Vora A, Lennard L. Comparison of thiopurine dose intensity, thiopurine metabolism and neutropenia in children with acute lymphoblastic leukaemia taking thioguanine or mercaptopurine. *Br J Clin Pharmacol.* 2008;65(6):993–4.
34. Cartwright C, Vora A, Lennard L. Thiopurine methyltransferase activity in the clinical management of childhood acute lymphoblastic leukaemia. *Br J Clin Pharmacol.* 2011;987–8.
35. Lancaster D, Patel N, Lennard L, Lilleyman J. Leucocyte versus erythrocyte thioguanine nucleotide concentrations in children taking thiopurines for acute lymphoblastic leukaemia. *Cancer Chemother Pharmacol.* 2002;50(1):33–6.
36. Lennard L. Comparison of red and white cell 6-thioguanine nucleotide concentrations in children with lymphoblastic leukaemia on 6-mercaptopurine and 6-thioguanine therapy. *Br J*

Clin Pharmacol. 2001;52:476P.

37. Lennard L, Vora AJ, Kinsey S, Eden OB, Richards S, Lilleyman JS, et al. Thioguanine-related veno-occlusive disease (VOD) of the liver in children with acute lymphoblastic leukaemia (ALL). *Br J Clin Pharmacol.* 2003;55(4):437.
38. Lennard L, Richards SM, Mitchell CD, Cartwright C, Eden TO, Kinsey SE, et al. Thioguanine compared with mercaptopurine in childhood lymphoblastic leukaemia: Results of the United Kingdom medical research council randomised trial ALL97. *Blood.* 2005;106(11):255A.
39. Lennard L, Richards S, Cartwright CS, Mitchell C, Lilleyman JS, Vora A. The thiopurine methyltransferase genetic polymorphism is associated with thioguanine-related veno-occlusive disease of the liver in children with acute lymphoblastic leukemia. *Clin Pharmacol Ther.* 2006 Oct;80(4):375–83.
40. Lennard L, Cartwright C, Wade R, Richards S, Mitchell C, Kinsey S, et al. The clinical pharmacology of thioguanine vs. mercaptopurine in ALL97, a randomized trial for the treatment of childhood lymphoblastic leukaemia. *Br J Clin Pharmacol.* 2008;65(6):994.
41. Lennard L, Cartwright C, Wade R, Richards S, Mitchell C, Kinsey S, et al. Thioguanine versus mercaptopurine in ALL97: thiopurine metabolism and treatment outcome. *Br J Haematol.* 2008;141:32–3.
42. Lennard L, Cartwright CS, Wade R, Richards SM, Vora A. Thiopurine methyltransferase genotype-phenotype discordance and thiopurine active metabolite formation in childhood acute lymphoblastic leukaemia. *Br J Clin Pharmacol.* 2013;76(1):125–36.
43. Lennard L, Cartwright CS, Wade R, Vora A. Thiopurine dose intensity and treatment outcome in childhood lymphoblastic leukaemia: The influence of thiopurine methyltransferase pharmacogenetics. *Br J Haematol.* 2015;169(2):228–40.

44. Mitchell C, Kinsey S, Vora A, Richards S, Eden T. MRC ALL97/99 - A randomized comparison of dexamethasone versus prednisolone and thioguanine versus mercaptopurine in the treatment of childhood acute lymphoblastic leukemia. *Blood*. 2002;156a.
45. Mitchell C, Payne J, Wade R, Vora A, Kinsey S, Richards S, et al. The impact of risk stratification by early bone-marrow response in childhood lymphoblastic leukaemia: Results from the United Kingdom Medical Research Council trial ALL97 and ALL97/99. *Br J Haematol*. 2009;146(4):424–36.
46. Mitchell C, Richards S, Harrison CJ, Eden T. Long-term follow-up of the United Kingdom medical research council protocols for childhood acute lymphoblastic leukaemia, 1980-2001. *Leukemia*. 2010;24(2):406–18.
47. Vora A, Mitchell C, Kinsey S, Richards S, Eden T, Lilleyman J, et al. Thioguanine-related veno-occlusive disease (VOD) of the liver in children with acute lymphoblastic leukemia (ALL): report from United Kingdom Medical Research Council (UK MRC) trial ALL. *Blood*. 2002;100(11):36a.
48. Jacobs SS, Stork L, Bostrom BC, Hutchinson R, Holcenberg J, Reaman GH, et al. Treatment of newly diagnosed children with lower-risk leukemia: A collaborative Children's Cancer Group (CCG)/NCI pilot trial incorporating 6-thioguanine. *J Clin Oncol*. 2005;23(16):809S.
49. Lowe ES, Kitchen BJ, Erdmann G, Stork LC, Bostrom BC, Hutchinson R, et al. Plasma pharmacokinetics and cerebrospinal fluid penetration of thioguanine in children with acute lymphoblastic leukemia: a collaborative Pediatric Oncology Branch, NCI, and Children's Cancer Group study. *Cancer Chemother Pharmacol*. 2001 Mar 19;47(3):199–205.
50. Cheung TK, Florin THJ. 6-Thioguanine: A new old drug to procure remission in inflammatory bowel disease. *Intern Med J*. 2003;33:44–6.
51. Deibert P, Dilger K, Hofmann U, Nauck S, Stoelben S, Kreisel W. High variation of 6-

- thioguanine absorption in patients with chronic active Crohn's disease. *Gastroenterology*. 2003;124(4):A522–3.
52. Dubinsky MC, Hassard P V, Abreu MT, Kam LY, Seidman EG, Targan SR, et al. Thioguanine (6-TG): A therapeutic alternative in a subgroup of IBD patients failing 6-mercaptopurine (6-MP). *Gastroenterology*. 2000;118(4):A891.
53. Dubinsky MC, Feldman E, Abreu MT, Seidman EG, Baroni D, Kornbluth A, et al. Idiosyncratic adverse reactions to 6-mercaptopurine (6-MP) and azathioprine (AZA) can be averted by switching to thioguanine(G-TG) in patients with IBD. *Gastroenterology*. 2001;120(5):A12.
54. Dubinsky MC, Hassard P V, Seidman EG, Kam LY, Abreu MT, Targan SR, et al. An open-label pilot study using thioguanine as a therapeutic alternative in Crohn's disease patients resistant to 6-mercaptopurine therapy. *Inflamm Bowel Dis*. 2001 Aug;7(3):181–9.
55. Dubinsky MC, Feldman EJ, Abreu MT, Targan SR, Vasiliauskas EA. Thioguanine: A potential alternate thiopurine for IBD patients allergic to 6-mercaptopurine or azathioprine. *Am J Gastroenterol*. 2003;98(5):1058–63.
56. Dubinsky MC, Vasiliauskas E, Singh H, Tran T, Papadakis K, Abreu M, et al. 6-thioguanine (6-TG) may cause serious liver injury in inflammatory bowel disease (IBD) patients. *Gastroenterology*. 2003;124(4):A8.
57. Geller SA, Poordad FF, Dubinsky MC, Cohen AH, Vasiliauskas EA, Abreu MT, et al. Hepatic nodular hyperplasia (sabourin lesion) and submicroscopic fibrosis associated with 6-thioguanine (6-TG) therapy in inflammatory bowel disease (IBD). *Lab Invest*. 2003;83(1):273A.
58. Geller SA, Dubinsky MC, Poordad FF, Vasiliauskas EA, Cohen AH, Abreu MT, et al. Early hepatic nodular hyperplasia and submicroscopic fibrosis associated with 6-thioguanine

- therapy in inflammatory bowel disease. *Am J Surg Pathol*. 2004 Sep;28(9):1204–11.
59. Ferlitsch A, Teml A, Reinisch W, Wrba F, Ulbrich G, Ploner M, et al. 6-Thioguanine associated nodular regenerative hyperplasia in patients with inflammatory bowel disease may induce portal hypertension. *Hepatology*. 2005;42(4):511A–12A.
60. Hasyagar CP, Foster EN, Gerich M, Prindiville TP. Treatment of inflammatory bowel disease with 6-thioguanine (6-TG): Retrospective case series from a tertiary care center. *Am J Gastroenterol*. 2007;102:S490.
61. Ivastinovic D, Hoegenauer C, Petritsch W, Wenzl HH, Hinterleitner TA. Efficacy of 6-thioguanine in patients with Crohn's disease intolerant to azathioprine. *Gastroenterology*. 2004;126(4):A630–1.
62. Jharap B, de Boer NK, Vos RM, Peters GJ, Wilhelm B, Mulder CJ, et al. Levels of 6-thioguanine nucleotides following oral and intravenous administration of relatively low-dosed 6-TG (0,3 mg/kg) in IBD-patients. *Gastroenterology*. 2008;134(4):A208.
63. Kornbluth A, Kissous M, George J, Dubinsky MC. "Lower" 6-thioguanine (6-TG) levels may be as effective as "higher" 6-TG levels in IBD patients treated with thioguanine. *Gastroenterology*. 2002;122(4):A221.
64. Omer OS, Salehi S, Pee L, Gera A, Loganayagam A. 6-Thioguanine as an alternative therapy in inflammatory bowel disease-experience in a London district general hospital. *United Eur Gastroenterol J*. 2015;1:A437.
65. Pavlidis P, Ansari AR, Duley J, Oancea I, Florin T. Splitting the normal daily dose of thioguanine may be efficacious treatment for IBD and avoid hepatic toxicity. *Gastroenterology*. 2014;1:S457.
66. Qasim A, McDonald S, Sebastian S, McLoughlin R, Buckley M, O'Connor H, et al. Efficacy and safety of 6-thioguanine in the management of inflammatory bowel disease. *Scand J*



- Gastroenterol. 2007;42(2):194–9.
67. Saleem R, Gera A, Tranah TH, Paolino A, Loganayagam A. To evaluate the efficacy and safety of 6-thioguanine therapy in patients with inflammatory bowel disease-a London DGH experience. *United Eur Gastroenterol J.* 2013;1:A526.
  68. Almer SH, Hjortswang H, Peterson C, Hindorf U. 6-thioguanine therapy in Crohn's disease - A Swedish experience. *Gastroenterology.* 2007;132(4):A185.
  69. Almer SH, Hjortswang H, Hindorf U. 6-Thioguanine therapy in Crohn's disease--observational data in Swedish patients. *Dig Liver Dis.* 2009 Mar;41(3):194–200.
  70. Bernstein C, Onken J. High erythrocyte 6-thioguanine (6-TG) levels are not associated with leukopenia in inflammatory bowel disease (IBD) patients treated with 6-TG. *Gastroenterology.* 2002;122(4):A221.
  71. Bokemeyer B. Immunosuppressive therapy and biological therapeutics for the treatment of inflammatory bowel diseases (IBD). *Verdauungskrankheiten.* 2003;21(6):277–87.
  72. Bonaz B, Boitard J, Marteau P, Lemann M, Belaiche J, Fournet J, et al. 6-thioguanine in patients intolerant to 6-mercaptopurine/azathioprine. *Gastroenterology.* 2002;122(4):A432.
  73. Bonaz B, Boitard J, Marteau P, Lemann M, Coffin B, Flourie B, et al. Tioguanine in patients with Crohn's disease intolerant or resistant to azathioprine/mercaptopurine. *Aliment Pharmacol Ther.* 2003;18(4):401–8.
  74. Herrlinger KR, Deibert P, Schwab M, Kreisel W, Fischer C, Fellermann K, et al. Remission maintenance by tioguanine in chronic active Crohn's disease. *Aliment Pharmacol Ther.* 2003;17(12):1459–64.
  75. Herrlinger KR, Kreisel W, Deibert P, Schwab M, Fellermann K, Stange EF. 6-thioguanine maintains remission in chronic active Crohn's disease. *Gastroenterology.* 2003;124(4):A519.
  76. Herrlinger KR, Kreisel W, Schwab M, Schoelmerich J, Fleig WE, Ruhl A, et al. 6-

- Thioguanine - Efficacy and safety in chronic active Crohn's disease. *Aliment Pharmacol Ther.* 2003;17(4):503–8.
77. Herrlinger KR, Fellermann K, Fischer C, Kreisel W, Deibert P, Schoelmerich J, et al. Thioguanine-nucleotides do not predict efficacy of tioguanine in Crohn's disease. *Aliment Pharmacol Ther.* 2004;19(12):1269–76.
78. Klugmann T, Bokemeyer B. Long-term-tolerance of 6-thioguanine in outpatients with IBD. *Verdauungskrankheiten.* 2005;23(4):181–5.
79. Seiderer J, Reinisch W, Zech C, Diebold J, Wrba F, Harrer M, et al. Nodular regenerative hyperplasia in IBD patients on 6-thioguanine - a multicentre safety assessment by MRI and liver biopsy. *Gastroenterology.* 2004;126(4):A112.
80. Seiderer J, Zech CJ, Reinisch W, Lukas M, Diebold J, Wrba F, et al. A multicenter assessment of liver toxicity by MRI and biopsy in IBD patients on 6-thioguanine. *J Hepatol.* 2005 Aug;43(2):303–9.
81. Teml A, Harrer M, Schwab M, Dejaco C, Mantl M, Vogelsang H, et al. Safety and efficacy of 6-thioguanine (6-TG) in patients with ulcerative and indeterminate colitis intolerant or resistant to azathioprine and/or 6-mercaptopurine (Aza/6-MP). *Gastroenterology.* 2003;124(4):A524.
82. Teml A, Schwab M, Harrer M, Miehsler W, Schaeffeler E, Dejaco C, et al. A prospective, open-label trial of 6-thioguanine in patients with ulcerative or indeterminate colitis. *Scand J Gastroenterol.* 2005;40(10):1205–13.
83. Teml A, Dejaco C, Miehsler W, Harrer M, Vogelsang H, Reinisch W. Long-term efficacy of 6-thioguanine in patients with inflammatory bowel disease. *Gastroenterology.* 2005;128(4):A587.
84. Zech CJ, Seiderer J, Reinisch W, Ochsenkuhn T, Schima W, Diebold J, et al. Thioguanin-

induced nodular regenerative hyperplasia of the liver-ROC analysis of different MR techniques. *Eur Radiol.* 2007;17(7):1898–905.

85. Harrer M, Schwab M, Teml A, Dejaco C, Mantl M, Vogelsang H, et al. Open prospective study on 6-thioguanine (6-TG) for Crohn's disease (CD) intolerant or resistant to azathioprine (AZA) and/or 6-mercaptopurine (6-MP). *Gastroenterology.* 2003;124(4):A521.
86. Piel B, Vaidya S, Lancaster D, Taj M, Pritchard-Jones K, Stoneham S, et al. Chronic hepatotoxicity following 6-thioguanine therapy for childhood acute lymphoblastic leukaemia [4] (multiple letters). *Br J Haematol.* 2004;125(3):410–2.
87. Ramanujachar R, Richards S, Hann I, Goldstone A, Mitchell C, Vora A, et al. Adolescents with acute lymphoblastic leukaemia: outcome on UK national paediatric (ALL97) and adult (UKALLXII/E2993) trials. *Pediatr Blood Cancer.* 2007;48(3):254–61.
88. Ravikumara M. 6-thioguanine related hepatotoxicity in children with acute lymphoblastic leukaemia - A dual centre experience. *J Pediatr Gastroenterol Nutr.* 2005;40(5):677.
89. Ravikumara M, Hill FGH, Wilson DC, Gillett PM, Thomas A, Brown R, et al. 6-Thioguanine-related chronic hepatotoxicity and variceal haemorrhage in children treated for acute lymphoblastic leukaemia - A dual-centre experience. *J Pediatr Gastroenterol Nutr.* 2006;42(5):535–8.
90. Roy Moulik N, Potter E, Height S, Vaidya S, Lancaster D, Taj M. Long term follow-up of 6-thioguanine-induced hepatotoxicity in children treated on UKALL 97/99 protocol; the royal Marsden experience. *Pediatr Blood Cancer.* 2015;62:S259.
91. de Boer NK, de Graaf P, Wilhelm AJ, Mulder CJJ, van Bodegraven AA. On the limitation of 6-tioguaninenucleotide monitoring during tioguanine treatment. *Aliment Pharmacol Ther.* 2005;22(5):447–51.
92. de Boer NK, Derijks LJ, Gilissen LP, Hommes DW, Engels LG, De-Boer SY, et al. On

- tolerability and safety of a maintenance treatment with 6-thioguanine in azathioprine or 6-mercaptopurine intolerant IBD patients. *World J Gastroenterol*. 2005 Sep 21;11(35):5540–4.
93. de Boer NK, Derijks LJ, Gilissen LP, Hommes DW, Engels LG, de Boer S, et al. Maintenance treatment with 6-thioguanine in azathioprine or 6-mercaptopurine intolerant IBD patients. *Gastroenterology*. 2005;128(4):A199.
94. de Boer NK, Derijks LJ, Keizer-Garritsen JJ, Lambooy LH, Ruitenbeek W, Hooymans PM, et al. Extended thiopurine metabolite assessment during 6-thioguanine therapy for immunomodulation in crohn's disease. *J Clin Pharmacol*. 2007;47(2):187–91.
95. de Boer NK, Gilissen LP, Derijks LJ, den Hartog G, Westerveld BD, Engels L, et al. Hepatotoxicity of long-term and low-dose 6-thioguanine in IBD patients. *Eur J Gastroenterol Hepatol*. 2007;19(10):A20–1.
96. de Boer NK, Zondervan PE, Gilissen LP, den Hartog G, Westerveld BD, Derijks LJJ, et al. Absence of nodular regenerative hyperplasia after low-dose 6-thioguanine maintenance therapy in inflammatory bowel disease patients. *Dig liver Dis*. 2008 Feb;40(2):108–13.
97. De Jong D, Derijks L, Engels L, Jansen J, Hooymans P, Mulder C. 6-thioguanine seems promising in azathioprine intolerant patients. *Gastroenterology*. 2002;122(4):A432.
98. Derijks LJ, De Jong DJ, Gilissen LP, Engels L, Mulder CJ, Bos LP, et al. 6-Thioguanine in azathioprine and 6-mercaptopurine intolerant patients with inflammatory bowel disease. *Br J Clin Pharmacol*. 2002;53(5):546P–7P.
99. Derijks LJ, De Jong DJ, Gilissen LP, Engels LG, Hooymans PM, Jansen JB, et al. 6-Thioguanine seems promising in azathioprine- or 6-mercaptopurine-intolerant inflammatory bowel disease patients: A short-term safety assessment. *Eur J Gastroenterol Hepatol*. 2003;15(1):63–7.
100. Derijks LJ, Gilissen LP, Engels LG, Bos LP, Bus PJ, Lohman JJ, et al. Pharmacokinetics of

- 6-thioguanine in patients with inflammatory bowel disease. *Ther Drug Monit.* 2006 Feb;28(1):45–50.
101. Gilissen LPL, Derijks LJJ, Driessen A, Bos LP, Hooymans PM, Stockbrügger RW, et al. Toxicity of 6-thioguanine: no hepatotoxicity in a series of IBD patients treated with long-term, low dose 6-thioguanine. Some evidence for dose or metabolite level dependent effects? *Dig Liver Dis.* 2007 Feb;39(2):156–9.
  102. Jharap B, Mulder CJ, den Hartog G, Westerveld BD, Engels LG, de Jong DJ, et al. Adequately dosed 6-TG use in chronic intestinal inflammation is not associated with nodular regenerative hyperplasia: A series of 73 liver biopsies. *Gastroenterology.* 2007;132(4):A179.
  103. van Asseldonk DP, Jharap B, de Boer NK, Mulder CJ, van Bodegraven AA. 6-Thioguanine induces remission and mucosal healing in IBD. *Gastroenterology.* 2009;1:A656.
  104. van Asseldonk DP, Jharap B, de Boer NK, van Bodegraven AA, Mulder CJ. Adequately dosed 6-thioguanine is a well tolerated and safe rescue drug in azathioprine or 6-mercaptopurine intolerant IBD patients. *Gastroenterology.* 2009;1:A654.
  105. van Asseldonk DP, Jharap B, de Boer NK, Zondervan PE, Bloemena E, Den Hartog G, et al. Liver histology of IBD patients who are treated with 6-thioguanine due to failure of conventional thiopurines reveals very few cases of nodular regenerative hyperplasia. *Gastroenterology.* 2010;1:S62.
  106. van Asseldonk DP, van Bodegraven AA, Mulder CJ. Azathioprine or 6-mercaptopurine associated hepatotoxicity diminishes upon administration of 6-thioguanine in IBD patients. *Gastroenterology.* 2010;1:S674.
  107. van Asseldonk DP, Jharap B, Kuik DJ, de Boer NK, Westerveld BD, Russel MG, et al. Prolonged thioguanine therapy is well tolerated and safe in the treatment of ulcerative colitis. *Dig Liver Dis.* 2011 Feb;43(2):110–5.

108. van Asseldonk DP, Seinen ML, de Boer NK, van Bodegraven AA, Mulder CJ. Hepatotoxicity associated with 6-methyl mercaptopurine formation during azathioprine and 6-mercaptopurine therapy does not occur on the short-term during 6-thioguanine therapy in IBD treatment. *J Crohns Colitis*. 2012;6(1):95–101.
109. van Asseldonk D, Jharap B, de Boer NK, Verheij J, den Hartog G, Russel MG, et al. No Nodular Regenerative Hyperplasia in Sequential Liver Biopsies During Thioguanine Maintenance Therapy in Inflammatory Bowel Disease Patients. *Gastroenterology*. 2014;146(5):S580–1.
110. Ansari A, Elliott T, Fong F, Arenas-Hernandez M, Rottenberg G, Portmann B, et al. Further experience with the use of 6-thioguanine in patients with Crohn’s disease. *Inflamm Bowel Dis*. 2008 Oct;14(10):1399–405.
111. Elliott T, Ansari A, Soon S, Fong F, Baburajan B, Arenas-Hernandez M, et al. Further experience with the use of 6-thioguanine as an alternative immunosuppressant in patients with crohn’s disease. *Gut*. 2007;56:A23.
112. Patel K, Goel R, Kariyawasam V, Blaker P, Ward M, Ray S, et al. Thioguanine remains an acceptable alternative immunosuppressant in IBD. *United Eur Gastroenterol J*. 2013;1:A64.
113. Soon SY, Ansari A, Fong FM, Hirst J, Sanderson JD. 6-thioguanine is well tolerated and reasonably effective in Crohn’s disease patients who are resistant or intolerant of azathioprine and methotrexate. *Gut*. 2004;53:A104.
114. Ward MG, Kariyawasam VC, Patel K V, Elliot TR, Blaker PA, Mogan SB, et al. Thioguanine use in inflammatory bowel disease: 13 year experience in a tertiary centre. *J Gastroenterol Hepatol*. 2013;2:99–100.
115. Bisschop D, Germain ML, Munzer M, Trenque T. [Thioguanine, pancreatotoxicity?]. *Therapie*. 2001;56(1):67–9.

116. Broxson EH, Dole M, Wong R, Laya BF, Stork LC. Portal hypertension (PH) develops in a subset of children treated with maintenance oral 6 thioguanine (TG) for standard risk acute lymphoblastic leukemia (SR-ALL). *Blood*. 2001;98(11):113A.
117. Chojnacki C, Romanowski M, Wachowska-Kelly P. Psychosomatic complications during treatment for ulcerative colitis. *Gastroenterol Rev*. 2012;1(1):52–5.
118. de Boer NK, Mulder CJJ, van Bodegraven AA. Nodular regenerative hyperplasia and thiopurines: the case for level-dependent toxicity. *Liver Transplant*. 2005 Oct;11(10):1300–1.
119. Fritz E, Wrba F, Knoflach P. Variceal hemorrhage in a patient with ulcerative colitis treated with 6-thioguanine. *Inflamm Bowel Dis*. 2008;14(4):582–3.
120. Kane S, Cohen SM, Hart J. Acute sinusoidal obstruction syndrome after 6-thioguanine therapy for Crohn’s disease. *Inflamm Bowel Dis*. 2004 Sep;10(5):652–4.
121. Mao J, Zhao F, Song H, Yang S, Shen D, Tang Y. Thioguanine treatment-related sinusoidal obstruction syndrome in 2 children. *Zhongguo Dang Dai Er Ke Za Zhi*. 2013;15(9):788–90.
122. Marasco G, Scaioli E, Renzulli M, Colecchia A, Golfieri R, Festi D, et al. MRI Patterns in a Case of 6-Thioguanine-Related Hepatic Sinusoidal Obstruction Syndrome. *Am J Gastroenterol*. 2016;111(6):767.
123. Mares WG, Wong DR, Gilissen LP, Masclee AA, Hooymans PM, Engels LG. Safe 6-thioguanine therapy of a TPMT deficient Crohn’s disease patient by using therapeutic drug monitoring. *J Crohn’s Colitis*. 2009;3(2):128–30.
124. Wong DR, Mares WGN, Gilissen LPL, Masclee AAM, Engels L, Neef C, et al. Safe and effective 6-thioguanine treatment of a thiopurine S-methyltransferase deficient Crohn’s disease patient using therapeutic drug monitoring. *Br J Clin Pharmacol*. 2009;68(1):138.
125. Merino JM, Casanova F, Saez-Royuela F, Velasco A, Gonzalez JB. Veno-occlusive disease of the liver associated with thiopurines in a child with acute lymphoblastic leukemia. *Pediatr*

- Hematol Oncol. 2000;17(5):429–31.
126. Nielsen SN, Frandsen TL, Nersting J, Hjalgrim LL, Schmiegelow K. Pharmacokinetics of 6-thioguanine and 6-mercaptopurine combination maintenance therapy of childhood ALL: Hypothesis and case report. *J Pediatr Hematol Oncol.* 2015;37(3):e206–9.
  127. Radys, W.; Kaminska, B.; Landowski, P.; Brodzicki J. The case of colitis ulcerosa - Diagnostic and therapeutic difficulties. *Pediatr Wspolczesna.* 2006;8(2):131–3.
  128. Rulyak SJ, Saunders MD, Lee SD. Hepatotoxicity associated with 6-thioguanine therapy for Crohn's disease. *J Clin Gastroenterol.* 2003;36(3 PG-234-237):234–7.
  129. Salerno A, Vacante M, Pollina D, Stancanelli B, Martini S, David E, et al. Liver veno-occlusive disease (VOD) in a patient given 6-thioguanine for crohn's disease. *Br J Med Pract.* 2014;7(2):a711.
  130. Shastri S, Dubinsky MC, Poordad F, Vasiliauskas E, Geller SA. Nodular hyperplasia of the liver (Sabourin lesion) occurring with inflammatory bowel diseases in association with 6-thioguanine therapy. *Am J Clin Pathol.* 2002;118(4):631.
  131. Shastri S, Dubinsky MC, Fred Poordad F, Vasiliauskas EA, Geller SA. Early nodular hyperplasia of the liver occurring with inflammatory bowel diseases in association with thioguanine therapy. *Arch Pathol Lab Med.* 2004;128(1):49–53.
  132. de Boer NK, van Elburg RM, Wilhelm AJ, Remmink AJ, van Vugt JM, Mulder CJ, et al. 6-Thioguanine for Crohn's disease during pregnancy: Thiopurine metabolite measurements in both mother and child. *Scand J Gastroenterol.* 2005;40(11):1374–7.
  133. Van den Berg SA, de Boer M, van der Meulen-de Jong AE, Jansen JM, Hoentjen F, Russel MG, et al. Safety of Tioguanine During Pregnancy in Inflammatory Bowel Disease. *J Crohns Colitis.* 2016;10(2):159–65.
  134. Wenzl HH, Hogenauer C, Fickert P, Petritsch W. Thioguanine-induced symptomatic



thrombocytopenia. Am J Gastroenterol. 2004;99(6):1195.
